1           **Decades of native bee biodiversity surveys at Pinnacles National Park**  
2           **highlight the importance of monitoring natural areas over time**

3

4                           Meiners, Joan M.<sup>1\*</sup>, Griswold, Terry L.<sup>2</sup>, Carril, Olivia Messinger<sup>3</sup>

5

6           <sup>1</sup> School of Natural Resources and Environment, University of Florida, Gainesville, FL 32611

7           <sup>2</sup> USDA-ARS Pollinating Insects Research Unit (PIRU), Utah State University, Logan, UT 84322

8           <sup>3</sup> 3 Juego Place, Santa Fe, NM, 87508

9

10           \*Corresponding author

11           Email: joan.meiners@gmail.com

12

13           **Keywords:** native bees, biodiversity hotspot, conservation, inventory, survey, refugia

## 14 **Abstract**

15           Thousands of species of bees are in global decline, yet research addressing the ecology  
16 and status of these wild pollinators lags far behind work being done to address similar impacts on  
17 the managed honey bee. This knowledge gap is especially glaring in natural areas, despite  
18 knowledge that protected habitats harbor and export diverse bee communities into nearby  
19 croplands where their pollination services have been valued at over \$3 billion per year.  
20 Surrounded by ranches and farmlands, Pinnacles National Park in the Inner South Coast Range  
21 of California contains intact Mediterranean chaparral shrubland. This habitat type is among the  
22 most valuable for bee biodiversity worldwide, as well as one of the most vulnerable to  
23 agricultural conversion, urbanization and climate change. Pinnacles National Park is also one of  
24 a very few locations where extensive native bee inventory efforts have been repeated over time.  
25 This park thus presents a valuable and rare opportunity to monitor long-term trends and baseline  
26 variability of native bees in natural habitats. Fifteen years after a species inventory marked  
27 Pinnacles as a biodiversity hotspot for native bees, we resurveyed these native bee communities  
28 over two flowering seasons using a systematic, plot-based design. Combining results, we report a  
29 total of 450 bee species within this 109km<sup>2</sup> natural area of California, including 48 new species  
30 records as of 2012 and 95 species not seen since 1999. As far as we are aware, this species  
31 richness marks Pinnacles National Park as one of the most densely diverse places known for  
32 native bees. We explore patterns of bee diversity across this protected landscape, compare results  
33 to other surveyed natural areas, and highlight the need for additional repeated inventories in  
34 protected areas over time amid widespread concerns of bee declines.

## 35 **Introduction**

36           The importance of bees as critical ecosystem service providers can scarcely be  
37 exaggerated. Twenty thousand species of bees worldwide provide the pollination services  
38 required for reproduction in 85% of wild and cultivated plants [1,2]. In the United States, the  
39 economic importance of bees to agriculture has been valued at up to \$14.6 billion annually [3],  
40 with \$3.08 billion and up to 30% of the U.S. diet specifically credited to the four thousand North  
41 American species of native, non-honey bees [4]. Diverse assemblages of native bees have been  
42 found capable of enhancing fruit set and yield in the presence of imported honey bees, and of  
43 providing adequate pollination for a majority of crops in their absence [5–7]. In natural areas,  
44 without the manpower of imported, managed honey bee hives, native bees play a key role in  
45 maintaining plant communities that provide soil structure, shelter other invertebrate ecosystem  
46 service providers, and establish the base of the food chain [8,9].

47           Although native bees are often observed pollinating agricultural fields, they seldom nest  
48 there. Instead, they rely on nearby remnant patches of semi-natural habitat, a resource that is  
49 rapidly disappearing with increasing agricultural intensification, habitat fragmentation, and urban  
50 development [10–12]. Despite recognition of natural areas as valuable reservoirs of pollinators  
51 [13,14], research on native bee ecology remains concentrated in urban or agricultural settings  
52 where baselines may already reflect impacts of degraded ecosystems. Compared to massive  
53 honey bee research efforts, progress towards a holistic understanding of how to protect wild bee  
54 communities or the habitats they require has not matched their value as pollinators or the known  
55 risks they face [15–17].

56           The relative paucity of research on native bees is due, in part, to the complexity of their  
57 biology and behaviors, particularly in wild landscapes. Efforts to monitor wild bees must  
58 contend with the 'taxonomic impediment' of expertise required to evaluate their vast global

59 biodiversity, and the logistics of sampling a taxon with rapid spatiotemporal turnover, short  
60 lifespans, and solitary, elusive habits [18–21]. Unlike many taxa that follow a latitudinal  
61 biodiversity gradient [22], bee diversity is highest in xeric and Mediterranean environments,  
62 owing to strong seasonal blooms and well-drained soils — features which support a range of  
63 foraging specializations and a high temporal turnover of ground-nesting species [19,20,23].  
64 When environmental conditions signal a poor year for host plants, some ground-nesting,  
65 specialist bee species can remain underground in diapause for additional years, necessitating  
66 multi-year biodiversity monitoring efforts [24]. This fine and irregular partitioning of space and  
67 time make native bees challenging, time-consuming, and expensive to exhaustively sample in  
68 any habitat [25]. Once found, many bee species are difficult to identify even with training and,  
69 given reports of functional redundancy within highly-nested pollination networks, the benefit to  
70 ecology of doing so may seem unclear [26,27]. However, links between non-random species loss  
71 and the stability of ecosystems and mutualistic networks [10,28–34] highlight the merits of  
72 species-level bee biodiversity monitoring.

73         Long-term monitoring of native bee species in natural areas is necessary to reliably assess  
74 trajectories of both thriving and struggling native bee communities over time, and to forecast  
75 their resilience to future climates and perturbations. Evidence is mounting that climate change  
76 affects biotic interactions, increases variability in flowering phenology, and disrupts temporal  
77 synchrony between plants and pollinators, potentially impacting plant reproduction and bee  
78 access to resources [35–38]. There is a growing need to improve our understanding of the  
79 background variability inherent in native bee communities in natural areas in order to contrast  
80 that with patterns recorded over time among bee species experiencing a plethora of shifting  
81 natural and anthropogenic pressures, including climatic instability, shifting habitat phenology,

82 resource depletion, urbanization, and invasion of novel parasites, predators or competitors that  
83 may alter ecosystem functioning and the structure of terrestrial communities [36,38,39].

84 Several large surveys of native bee faunas, particularly in the western United States, have  
85 added to current knowledge of the diversity and variability of bee species across space [40–47].

86 A pair of studies comparing bee faunas from several Mediterranean climate zones concluded that  
87 the chaparral habitats of California represent one of the highest global biodiversity hotspots for  
88 native bees [48,49]. In the late 1990s, Messinger and Griswold [42] found Pinnacles National  
89 Monument in California’s Inner South Coast Range to be one of the most diverse areas known  
90 for bees, with 393 bee species discovered in what was then a 68km<sup>2</sup> area. They attributed this  
91 remarkable richness, in part, to Pinnacles' high floral diversity and habitat heterogeneity [42],  
92 features which also make it an ideal place to investigate relationships between native bee  
93 community dynamics and environmental variables. In 2002, Pinnacles staff conducted a native  
94 bee survey of three changing habitats that added species and a time step to the record of bee  
95 biodiversity in the monument.

96 Fifteen years after that initial species inventory effort and a decade after the smaller  
97 survey, we returned to Pinnacles, which became a National Park in 2013, to reinventory its  
98 native bee biodiversity and establish a more systematic bee monitoring program [50]. Though  
99 several other bee biodiversity studies have spanned multiple years, as far as we are aware,  
100 Pinnacles is the only natural region with published results from exhaustive and repeated bee  
101 surveys over multiple decades, providing much-needed records of native bee biodiversity over  
102 longer periods of time. As such, our study may aid efforts to understand and protect native bee  
103 biodiversity in natural areas and help determine restoration goals for bee communities in  
104 degraded habitats. Here we seek to (a) present patterns of species occurrence and resource use  
105 from three decades of bee species inventories at Pinnacles National Park, (b) examine how bee

106 biodiversity density at this park compares to other published large-scale bee inventories across  
107 the United States, and (c) use this literature review and comparison to highlight the need for  
108 expanded systematic and repeated bee monitoring efforts in order to understand trajectories and  
109 variability of diverse native bee communities over time.

110

## 111 **Materials and Methods**

### 112 **Site description and collecting history**

113 Pinnacles National Park is a smaller national park, approximately 109km<sup>2</sup>, with a highly  
114 dynamic topography. The roughly oval-shaped park is bisected by a high rock-ridge spine  
115 running north-south that creates a steep elevational gradient and divides the park into a higher,  
116 coastal slope to the west and a drier, lower valley on the east. Initial sampling in 1996 by TLG  
117 suggested a rich bee fauna, and motivated the initiation of a more systematic effort to inventory  
118 the bee species across the then-monument's 65km<sup>2</sup> was undertaken the following year by OMC.  
119 This first full inventory spanned 1996-1999 and was conducted along the trail network by  
120 opportunistically collecting on a 10-14 day schedule using primarily active (handheld aerial nets)  
121 but also passive (pan traps or "bee bowls") methods during the peak flowering season (locally  
122 February through May). Efforts across these years varied in terms of collecting days (as few as 5  
123 or as many as 56 per year), months covered, and locations sampled. In 2002, a passive pan  
124 trapping study was conducted by a local park biologist in three grassland plots, with traps placed  
125 out every two weeks between March and mid-July, weather permitting. The purpose of this  
126 study was to examine changes in bee fauna related to native plant restoration efforts.

127 In 2005, Pinnacles National Monument acquired an additional 15km<sup>2</sup> of privately-owned  
128 land that expanded the park boundary primarily to the east, but also incorporated some relatively

129 inaccessible lands to the north and south. In 2010, TLG initiated a follow-up biodiversity survey  
130 of the bees at Pinnacles, including the new lands to the east. In order to better track temporal  
131 trajectories in native bee biodiversity and phenology, we adopted a more systematic park-wide  
132 sampling protocol and established long-term monitoring plots where timed, regular collecting  
133 events using both nets and pan traps were conducted by JMM across the 2011 and 2012  
134 flowering seasons. The following methods and results are focused on this most recent systematic  
135 survey, since a summary of the 1996-1999 inventory has previously been published [42].

## 136 **Field methods**

137 For the 2011-2012 re-inventory effort, we established ten 1-hectare long-term plots  
138 across a diversity of habitat types and reasonably-accessible areas of the park. We placed three  
139 plots on the western side of the rocky spine divide: two in grasslands and one in a Blue Oak  
140 woodland. On the larger, lower-elevation eastern side, we set up three plots in alluvial habitats,  
141 two in Live Oak woodlands, and one in a Blue Oak woodland. We also established one plot in a  
142 Blue Oak woodland along the high rock spine bisecting the park. One-hectare rectangular plots  
143 were roughly 200m by 50m, which fit the constraints of the narrow canyon landscapes. In  
144 addition to sampling within plots, we visited areas sampled during the original inventory as well  
145 as newly-acquired lands to conduct opportunistic aerial net collecting, and we set out pan traps at  
146 the same locations that were sampled using pan traps in 2002 (Fig 1). The geographic  
147 coordinates of these ten long-term monitoring locations are included in supplementary materials  
148 (S1 Table) and shown in the map of our field site (Fig 1).

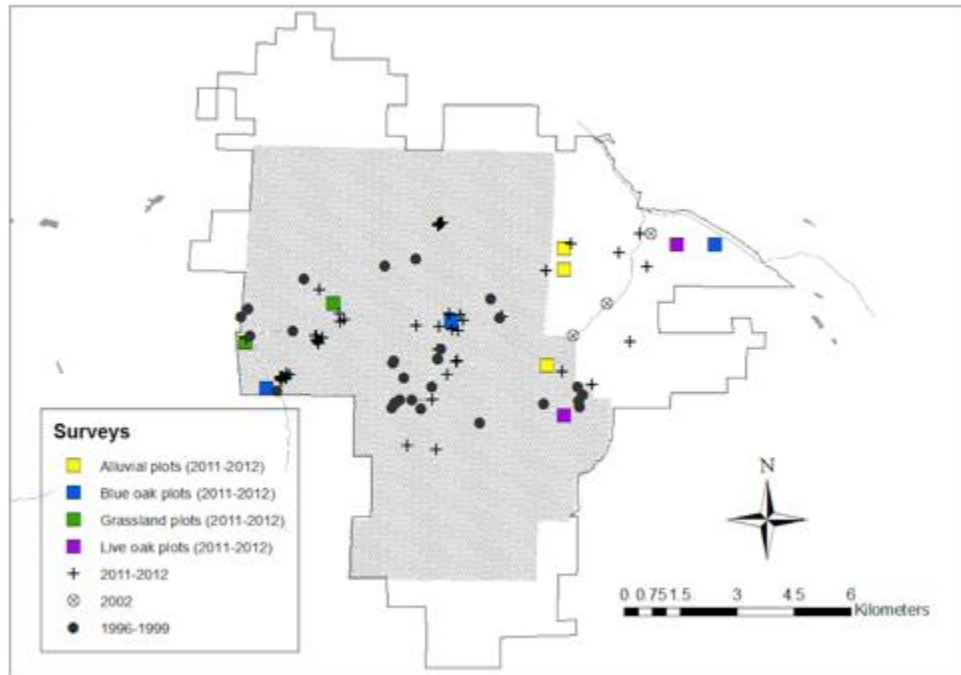

149

150 **Fig 1. Map of Pinnacles National Park in Monterey and San Benito Counties, California.**

151 As a national monument, established in 1908, it grew from 36 km<sup>2</sup> to 68km<sup>2</sup>, shown by the  
152 shaded region. The outlined area encompasses lands added in 2005 and represents the current  
153 national park boundary (109 km<sup>2</sup>). Locations sampled during the original native bee inventory of  
154 1996-1999 are marked with filled black circles. The three locations where native bees were  
155 sampled with pan traps in 2002 are marked by open circles around an 'x'. For the 2011-2012  
156 survey, plus signs mark sites of opportunistic sampling and colored squares indicate the habitat  
157 type and position (not sized to scale) of systematically-sampled hectare plots. Dense chaparral  
158 shrubs, steep hillsides, and few trail access points made the northern and southern regions of the  
159 park relatively inaccessible for repeated sampling efforts.

160



161           Spatially, our collecting extended beyond previous efforts to capture bee biodiversity in  
162 three main ways: by traveling off the trail network (along which most collecting was conducted  
163 in the 1990s, except for one extensive burned area) for plot and opportunistic sampling, by  
164 explicitly establishing repeatedly-sampled plots in a diversity of habitat types across the park,  
165 and by venturing into the 15km<sup>2</sup> of new lands acquired by Pinnacles National Monument in 2005  
166 for both opportunistic and systematic sampling, which had not been done save for one pan-  
167 trapping site in 2002 (Fig 1). Temporally, whereas sampling in the 1990s was somewhat  
168 irregular, in 2011-12 we sought to capture the full bee community phenology by sampling plots  
169 fortnightly throughout the entire flowering season, beginning in February before bee activity  
170 began and continuing through late June after most bloom had faded [51].

171           We sampled all ten plots, typically two per day, every fortnight on days that were mostly  
172 sunny, without high winds, and over 15C°. We conducted additional opportunistic net collecting  
173 along the trail network or in new off-trail areas in between plot efforts. Immediately before each  
174 collecting event, we recorded the ambient temperature, wind speed, humidity, barometric  
175 pressure, and a categorical cloud cover value. During plot sampling, two collectors used aerial  
176 nets to perform thirty-minute timed collections of all bees visually or auditorily detected in plots  
177 at consistent times in both the morning and afternoon. In order to sample the community as  
178 evenly and systematically as possible, we walked a steady pace through plots rather than  
179 focusing on activity at flowers. We placed all netted bees in vials according to their floral host  
180 and collected a voucher plant when the floral host was unknown. At the end of sampling days,  
181 we pinned and labeled all specimens and froze them for 48 hours to prevent beetle infestation.

182           In addition to net collecting, we also set out thirty colored pan traps, a common passive  
183 collection method, between 9am and 4pm in each plot on the day we net collected there. Pan  
184 traps were made prior to going into the field by spraying 2-oz Solo cups with one of three colors

185 of paint: fluorescent blue, fluorescent yellow, and white, as indicated by the protocol set up for  
186 native bee monitoring by Lebuhn et al. [52]. Traps were placed in alternating colors directly on  
187 the ground approximately 10m apart in an "X" pattern across rectangular plots and were filled  
188 3/4 full of mildly soapy water to break the surface tension and cause visiting bees to sink to the  
189 bottom. At 4pm, we strained insects from the water and immersed them in 75% ethanol until  
190 they could be rinsed, pinned and labelled. Data for each pan-trapped specimen includes the color  
191 of the bowl from which it was collected.

## 192 **Data management and summaries**

193 At the end of the field season, we brought all specimens to the USDA-ARS Pollinating  
194 Insect Research Unit (PIRU) in Logan, Utah and incorporated them into its US National  
195 Pollinating Insects Collection with the exception of small reference and display collections  
196 returned to Pinnacles National Park. Bee identifications were completed by trained experts using  
197 Leica dissecting microscopes, taxonomic literature, and the extensive reference collection housed  
198 at PIRU (approximately 1.5 million curated bee specimens). After processing all 2011 and 2012  
199 bee specimens, we reviewed all identifications for the Pinnacles bees from the 1996-1999 and  
200 2002 collections (which are also housed at PIRU) to ensure nomenclature was current and  
201 consistent with recent inventory identifications. We identified plant vouchers using appropriate  
202 keys [53] and guidance from botanists at Pinnacles or the Utah State University Intermountain  
203 Herbarium.

204 We entered field data into PIRU's existing relational database, assigned corresponding  
205 individual ID numbers and barcodes to each specimen, and pinned labels with this information to  
206 each bee. We conducted quality checks with multiple people at each step of the curation process.  
207 We used SQL and Microsoft Access to query and manage data, and Microsoft Excel, R-Cran

208 statistical package version 0.99.879 or ARC-GIS to clean, arrange, analyze, and map data [54].  
209 Data is either included as supplementary tables or will be deposited with Dryad. Data and code  
210 for analysis will be publicly available on Github.

211 We conducted various summary analyses to assess whether our sampling intensity  
212 provided a good characterization of bee biodiversity, and to explore what environmental factors  
213 may be related to the bee biodiversity at Pinnacles. We compared species diversity over time by  
214 grouping species data across all three sampling collections by year and family and plotting as  
215 total values or proportions of total diversity per year. To ascertain whether the recent sampling  
216 attempt had captured a sufficient portion of total estimated biodiversity at Pinnacles, we used  
217 plot-sample-level species data to construct a species-accumulation curve with 95% confidence  
218 intervals and expected species accumulation values using the 'vegan' package in R [55]. We  
219 assessed the distribution of bee species data using the Shapiro-Wilk normality test and the  
220 relationship between floral richness and bee richness or abundance at the plot-sample level using  
221 power-law regression models in the base R package.

## 222 **Literature review and study comparisons**

223 To place the bee biodiversity results at Pinnacles National Park in context with those of  
224 other bee inventory efforts across the United States, we conducted a literature search for all  
225 published studies that reported at least one hundred bee species from natural (non-agricultural,  
226 non-urban) areas and methods indicative of an exhaustive, systematic diversity inventory. Using  
227 Web of Science and Google Scholar, we identified nineteen published studies that met these  
228 criteria, to which we added four unpublished studies that qualify. To allow for a quantitative  
229 comparison of relative richness between exhaustive bee surveys, we used a novel metric to  
230 calculate biodiversity density along the species-area curve based on the number of species and  
231 genera reported in each publication as well as the total size of the area covered, described below.

232 For studies that did not specify the area of land covered, we contacted authors for estimates  
233 and/or performed a web search of the study place named to estimate total area surveyed.

234 Comparisons of the bee species richness over area size reported by different studies was  
235 conducted according to Arrhenius' original description of the species-area relationship as a  
236 double logarithmic equation [56,57]:

$$237 \quad \log S = \log k + z \log A, \quad (1)$$

238 where S represents the number of species recorded in an area of size A, and k and  
239 z are constants that may vary with the taxa or habitat assessed.

240 To quantify the relative richness of studies conducted over different-sized areas and to identify  
241 each as recording either above or below the richness per area expected by the relationship  
242 defined above, we calculated the distance from each species-area point to the overall log-log  
243 regression line calculated according to equation (1) above. We then plotted these  
244 observed:expected values in a barplot to compare the relative deviation above or below expected  
245 of bee biodiversity values from different studies identified in the literature. These calculations  
246 and visualizations were all conducted in R statistical package [54], and data and code are  
247 publicly available on GitHub.

248

## 249 **Results**

### 250 **Pinnacles bee collections over time**

251 Initial trail collecting between 1996-1999 yielded 27,055 bee specimens representing 382  
252 species and 52 genera collected over 125 collector days at 32 different locations within the old  
253 monument boundary (Table 1) (differences from results reported by Messinger and Griswold in  
254 2003 are a result of recent taxonomic changes) [42]. The smaller pan trapping study by park

255 biologist Amy Fesnock over 10 days in 2002 yielded 7,255 bees representing 151 species and 38  
256 genera from 3 different locations in the central lowlands of the eastern edge and exterior of the  
257 monument boundary. In the recent inventory during the flowering seasons of 2011 and 2012, we  
258 captured 52,789 bees over 214 collector days (107 days with two collectors) at 90 different  
259 locations across all accessible areas of the park (Fig 1). This effort resulted in a collection of 291  
260 bee species across 45 genera in 2011 and 294 species across 49 genera in 2012 (Table 1a). There  
261 was a 79% overlap in species and a 94% overlap in genera between the two years (Table 1b).  
262 The preservation and curation of older specimens enabled us to update species determinations  
263 from previous inventories based on more recent taxonomic changes to compare and combine  
264 biodiversity records across inventory efforts (Table 2).

265 **Table 1. Summary of bee sampling efforts at Pinnacles National Park.** (a) Specimen  
 266 collection statistics by year of sampling. (b) Proportion of overlap between bee species and  
 267 genera collected during each year of sampling.

268 **(a)**

| Bee collection statistics for Pinnacles Natl Park                                                                                                                       | Grand totals  | Year                                                             |      |      |      |                                |                                                                                                                  |       |
|-------------------------------------------------------------------------------------------------------------------------------------------------------------------------|---------------|------------------------------------------------------------------|------|------|------|--------------------------------|------------------------------------------------------------------------------------------------------------------|-------|
|                                                                                                                                                                         |               | 1996                                                             | 1997 | 1998 | 1999 | 2002                           | 2011                                                                                                             | 2012  |
| Number of Specimens Collected                                                                                                                                           | <b>87,099</b> | 1362                                                             | 8077 | 9382 | 8234 | 7255                           | 20351                                                                                                            | 32438 |
| Number of Species Collected                                                                                                                                             | <b>450</b>    | 172                                                              | 299  | 313  | 211  | 151                            | 291                                                                                                              | 294   |
| Number of Genera Collected                                                                                                                                              | <b>54</b>     | 38                                                               | 48   | 49   | 43   | 38                             | 45                                                                                                               | 49    |
| Number of New Species Records                                                                                                                                           | --            | all                                                              | 140  | 60   | 10   | 20                             | 22                                                                                                               | 26    |
| Number of New Genus Records                                                                                                                                             | --            | all                                                              | 11   | 1    | 0    | 0                              | 0                                                                                                                | 3     |
| Specimens per New Species Record                                                                                                                                        | <b>177</b>    | 8                                                                | 56   | 142  | 749  | 470                            | 565                                                                                                              | 903   |
| Specimens per New Genus Record                                                                                                                                          | <b>1668</b>   | 36                                                               | 734  | 9383 | --   | --                             | --                                                                                                               | 10839 |
| Species Unique to that Year                                                                                                                                             | --            | 4                                                                | 22   | 21   | 2    | 5                              | 15                                                                                                               | 26    |
| Genera Unique to that Year                                                                                                                                              | --            | 1                                                                | 0    | 0    | 0    | 0                              | 0                                                                                                                | 3     |
| Days of Collecting                                                                                                                                                      | <b>246</b>    | 5                                                                | 50   | 56   | 14   | 10                             | 55                                                                                                               | 52    |
| <b>Methodology (equipment):</b><br><i>Since methodology and sampling effort vary widely between years and projects, comparisons should be interpreted with caution.</i> |               | Opportunistic trail collecting (aerial handheld net) + pan traps |      |      |      | Passive collecting (pan traps) | Plot (N=10) sampling (aerial nets + pan traps); Trail collecting (nets); Resample of 2002 bowl sites (pan traps) |       |
| Primary Collectors                                                                                                                                                      |               | Olivia Messinger Carril & Terry Griswold                         |      |      |      | Amy Fesnock                    | Joan Meiners & Therese Lamperty                                                                                  |       |

269 **(b)**

|                                                        | 1996       | 1997       | 1998       | 1999       | 2002       | 2011       | 2012       | Proportion of species in common (above daigonal) |
|--------------------------------------------------------|------------|------------|------------|------------|------------|------------|------------|--------------------------------------------------|
| 1996                                                   | <b>1.0</b> | 0.68       | 0.64       | 0.71       | 0.52       | 0.63       | 0.61       |                                                  |
| 1997                                                   | 0.86       | <b>1.0</b> | 0.81       | 0.73       | 0.49       | 0.75       | 0.52       |                                                  |
| 1998                                                   | 0.85       | 0.99       | <b>1.0</b> | 0.72       | 0.52       | 0.78       | 0.75       |                                                  |
| 1999                                                   | 0.89       | 0.95       | 0.93       | <b>1.0</b> | 0.52       | 0.69       | 0.67       |                                                  |
| 2002                                                   | 0.87       | 0.88       | 0.87       | 0.91       | <b>1.0</b> | 0.57       | 0.59       |                                                  |
| 2011                                                   | 0.89       | 0.95       | 0.96       | 0.93       | 0.92       | <b>1.0</b> | 0.79       |                                                  |
| 2012                                                   | 0.85       | 0.93       | 0.94       | 0.91       | 0.87       | 0.94       | <b>1.0</b> |                                                  |
| <b>Proportion of genera in common (below diagonal)</b> |            |            |            |            |            |            |            |                                                  |

270 **Table 2. Overview of Pinnacles National Park bee biodiversity and comparisons between**  
 271 **survey efforts.** Numbers of species unique to that survey timeframe are in parentheses. Due to  
 272 taxonomic changes, updated species determinations, and the addition of data from 2002, some  
 273 totals differ from those reported in Messinger and Griswold 2003. See S2 Table for additional  
 274 species details.

| Family               | Genus               | Number of species in early surveys (1996-1999, 2002) | Number of species in recent survey (2011-2012) | Number of singleton species (repeated by only one specimen) | Number of species recorded only in new lands (acquired in 2005) | Cleptoparasitic (C); Oligolectic (O) |
|----------------------|---------------------|------------------------------------------------------|------------------------------------------------|-------------------------------------------------------------|-----------------------------------------------------------------|--------------------------------------|
| Andrenidae           | <i>Ancylandrena</i> | 1 (1)                                                |                                                | 1                                                           |                                                                 | O                                    |
|                      | <i>Andrena</i>      | 60 (19)                                              | 49 (8)                                         | 7                                                           | 3                                                               |                                      |
|                      | <i>Calliopsis</i>   | 8 (2)                                                | 6                                              |                                                             |                                                                 | O                                    |
|                      | <i>Macrotera</i>    | 1                                                    | 1                                              |                                                             |                                                                 | O                                    |
|                      | <i>Panurginus</i>   | 4 (1)                                                | 3                                              |                                                             |                                                                 |                                      |
|                      | <i>Perdita</i>      | 13 (5)                                               | 10 (2)                                         | 3                                                           | 1                                                               | O                                    |
| Apidae               | <i>Anthophora</i>   | 12 (4)                                               | 8                                              | 3                                                           |                                                                 |                                      |
|                      | <i>Anthophorula</i> | 2                                                    | 2                                              |                                                             |                                                                 |                                      |
|                      | <i>Apis</i>         | 1                                                    | 1                                              |                                                             |                                                                 |                                      |
|                      | <i>Bombus</i>       | 6 (1)                                                | 5                                              |                                                             |                                                                 |                                      |
|                      | <i>Brachynomada</i> |                                                      | 1 (1)                                          |                                                             |                                                                 | C                                    |
|                      | <i>Centris</i>      | 1 (1)                                                |                                                |                                                             |                                                                 |                                      |
|                      | <i>Ceratina</i>     | 11                                                   | 11                                             |                                                             |                                                                 |                                      |
|                      | <i>Diadasia</i>     | 5                                                    | 9 (3)                                          | 1                                                           |                                                                 | O                                    |
|                      | <i>Epeolus</i>      | 3                                                    | 4 (1)                                          |                                                             | 1                                                               | C                                    |
|                      | <i>Eucera</i>       | 9                                                    | 9                                              |                                                             |                                                                 |                                      |
|                      | <i>Habropoda</i>    | 3 (1)                                                | 2                                              |                                                             |                                                                 |                                      |
|                      | <i>Melecta</i>      | 3                                                    | 3                                              |                                                             |                                                                 | C                                    |
|                      | <i>Melissodes</i>   | 9 (4)                                                | 8 (3)                                          | 3                                                           | 3                                                               |                                      |
|                      | <i>Neopasites</i>   |                                                      | 1 (1)                                          | 1                                                           | 1                                                               | C                                    |
|                      | <i>Nomada</i>       | 26 (10)                                              | 21 (5)                                         | 6                                                           | 1                                                               | C                                    |
| <i>Oreopasites</i>   | 2                   | 2                                                    |                                                |                                                             | C                                                               |                                      |
| <i>Peponapis</i>     |                     | 1 (1)                                                |                                                |                                                             | O                                                               |                                      |
| <i>Townsendiella</i> | 2 (1)               | 1                                                    | 1                                              |                                                             | C                                                               |                                      |
| <i>Triepeolus</i>    | 2 (1)               | 7 (5)                                                | 1                                              | 1                                                           | C                                                               |                                      |
| <i>Xeromelecta</i>   | 2 (1)               | 1                                                    | 1                                              |                                                             | C                                                               |                                      |
| <i>Xylocopa</i>      | 1                   | 1                                                    |                                                |                                                             |                                                                 |                                      |
| Colletidae           | <i>Colletes</i>     | 5 (1)                                                | 5 (1)                                          | 2                                                           |                                                                 | O                                    |
|                      | <i>Hylaeus</i>      | 15 (5)                                               | 10                                             | 2                                                           |                                                                 |                                      |
| Halictidae           | <i>Agapostemon</i>  | 2                                                    | 2                                              |                                                             |                                                                 |                                      |

|              |                       |                 |                 |           |           |   |
|--------------|-----------------------|-----------------|-----------------|-----------|-----------|---|
|              | <i>Augochlorella</i>  | 1               | 1               |           |           |   |
|              | <i>Conanthalictus</i> | 2               | 2               |           |           | O |
|              | <i>Dufourea</i>       | 6               | 7 (1)           | 1         |           | O |
|              | <i>Halictus</i>       | 4 (1)           | 3               |           |           |   |
|              | <i>Lasioglossum</i>   | 28 (2)          | 29 (3)          | 2         | 2         |   |
|              | <i>Micralictoides</i> | 2               | 2               |           |           | O |
|              | <i>Sphecodes</i>      | 10 (5)          | 6 (1)           | 3         |           | C |
| Megachilidae | <i>Anthidiellum</i>   | 1               | 1               |           |           |   |
|              | <i>Anthidium</i>      | 6 (3)           | 5 (2)           | 1         | 1         |   |
|              | <i>Ashmeadiella</i>   | 16 (5)          | 13 (2)          | 2         | 1         |   |
|              | <i>Atoposmia</i>      | 3 (1)           | 3 (1)           | 1         |           | O |
|              | <i>Chelostoma</i>     | 7               | 7               |           |           | O |
|              | <i>Coelioxys</i>      | 4 (2)           | 3 (1)           | 1         |           | C |
|              | <i>Dianthidium</i>    | 5 (1)           | 4               | 1         |           |   |
|              | <i>Dioxys</i>         | 4 (1)           | 3               | 1         |           | C |
|              | <i>Heriades</i>       | 1 (1)           |                 |           |           |   |
|              | <i>Hoplitis</i>       | 17 (2)          | 15              |           |           | O |
|              | <i>Megachile</i>      | 18 (5)          | 15 (2)          | 1         |           |   |
|              | <i>Osmia</i>          | 38 (6)          | 35 (3)          | 5         | 2         |   |
|              | <i>Protosmia</i>      | 1               | 1               |           |           |   |
|              | <i>Stelis</i>         | 13 (2)          | 12 (1)          |           | 1         | C |
|              | <i>Trachusa</i>       | 2               | 2               |           |           |   |
| Melittidae   | <i>Hesperapis</i>     | 2               | 2               |           |           | O |
|              | <b>Totals</b>         | <b>417 (95)</b> | <b>355 (48)</b> | <b>51</b> | <b>18</b> |   |

275

276

277

278

279

280

281

282

283

284

285

The combined results from all three inventories document a total of 450 species of bees across 53 genera and all six North American bee families within the modest 109km<sup>2</sup> of Pinnacles National Park (Table 2). The most recent survey documented 48 new species records for the Pinnacles National Park area and did not recapture 95 species that had been collected in earlier studies (S2 Table). Of the 48 species recorded for the first time in 2011 and 2012, 47 were rare (here defined as represented by fewer than ten specimens), and 20 were singletons (represented by a single specimen) (S2 Table). Thirty of the 48 new species were captured in areas previously sampled, while 18 were only captured in new lands added to the park since previous inventories (Table 2). Overall, 51 of the 450 species were singletons (Table 2), and 95 were present in only one year of sampling, with the majority of these temporally rare species being from the families



286 Apidae and Andrenidae (Fig 2a). The family Megachilidae had the most species present in all  
287 seven years of sampling (N=38 out of 68 total) (Fig 2a). Overlap in species lists between years  
288 ranged from 49% to 81% and overlap in genera ranged from 85-99% between any two years  
289 (Table 1b).

290 Despite extensive sampling of bee biodiversity within Pinnacles National Monument  
291 between 1996-1999, subsequent sampling continued to add species richness to the overall  
292 collection (Fig 2b). The 2002 effort added 20 new species to the park list. The 2011 collection  
293 netted 22 bee species new to Pinnacles, and the 2012 collection, which sampled mostly the same  
294 areas as 2011, resulted in 26 new species and 3 never-before recorded genera within Pinnacles  
295 National Park (Table 1a). Between 2 and 26 species were unique to a particular year and not  
296 recorded within the park during any of the other six years of surveys. The genus *Ancylandrea*  
297 (family Andrenidae) was present only in the 1996 collection and 2012 was the only year that  
298 three genera from the family Apidae (*Neopasites*, *Peponapis*, and *Brachynomada*) were  
299 documented (S2 Table). For five out of six bee families, new species were added to the park list  
300 nearly every year. Melittidae is represented by only two common species, both of which were  
301 collected in the original year of sampling, and in every year thereafter (Fig 2b).

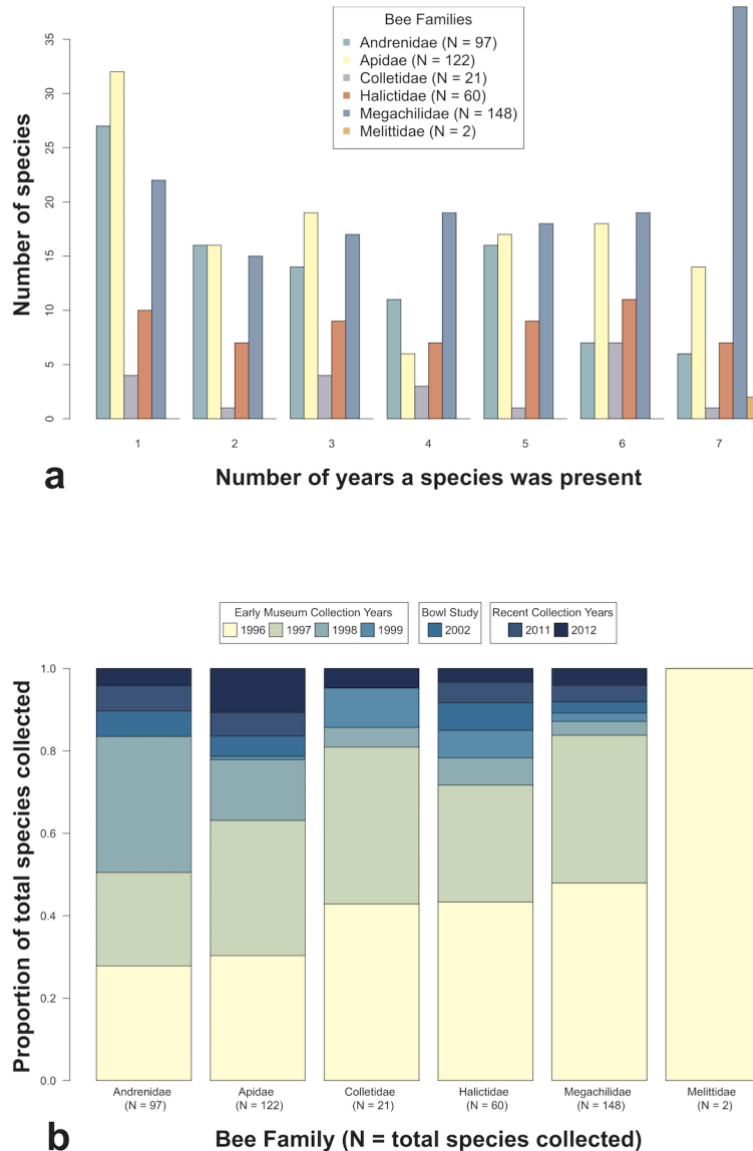

302

303 **Fig 2. Comparison of bee species collections at Pinnacles National Park over seven years of**

304 **surveys. (a) Numbers of species in each of six North American bee families represented in up to**

305 **all seven years of collections. (b) Accumulation over time of number of species collected in each**

306 **of six North American bee families from each additional year of collecting.**

## 307 **Recent Pinnacles bee survey details**

308           During the 2011-2012 survey, we completed 150 plot samples across our ten one-hectare  
309 plots, eighty in 2011 and seventy in 2012, sampling only on days that were sufficiently sunny,  
310 calm, and warm to ensure adequate bee activity for comparisons between plots. In 2011, 80 plot  
311 samples conducted over 55 days resulted in between 1 and 2088 bees from an individual plot  
312 sample, with a mean of 368 bees per plot per day and a standard deviation of 398. In 2012, 70  
313 plot samples conducted over 52 days resulted in between zero and 1317 bees collected in a day  
314 and plot, with a mean of 370 and a standard deviation of 380 bees per plot per day.

315           A species accumulation curve for the observed rate of capture of the 334 species  
316 collected in plots across 150 plot samples shows that our efforts captured a majority of the  
317 estimated true bee biodiversity within these areas (Fig 3). The leveling off of the curve at the far  
318 right indicates that additional plot sampling would be very slow to yield many more species to  
319 the collection, especially for organisms like insects for which observed richness rarely reaches a  
320 true asymptote [58]. The prevalence of singleton and doubleton species recorded across many  
321 genera illustrates the frequency of rare bee species at Pinnacles National Park, which additional  
322 sampling efforts may or may not detect (S2 Table). The blue curve and vertical confidence  
323 interval lines indicate the estimated rate of species accumulation for a random community with  
324 the same number of species and samples (Fig 3). That the observed curve has an initially steeper  
325 slope than expected is indicative of Pinnacles' rich biodiversity resulting in rapid early  
326 accumulation of common species. Expanding collecting efforts into the more remote chaparral  
327 habitats in the northern and southern ranges of the park may be more likely to record additional  
328 biodiversity without requiring enormous sampling efforts to do so (Fig 1).

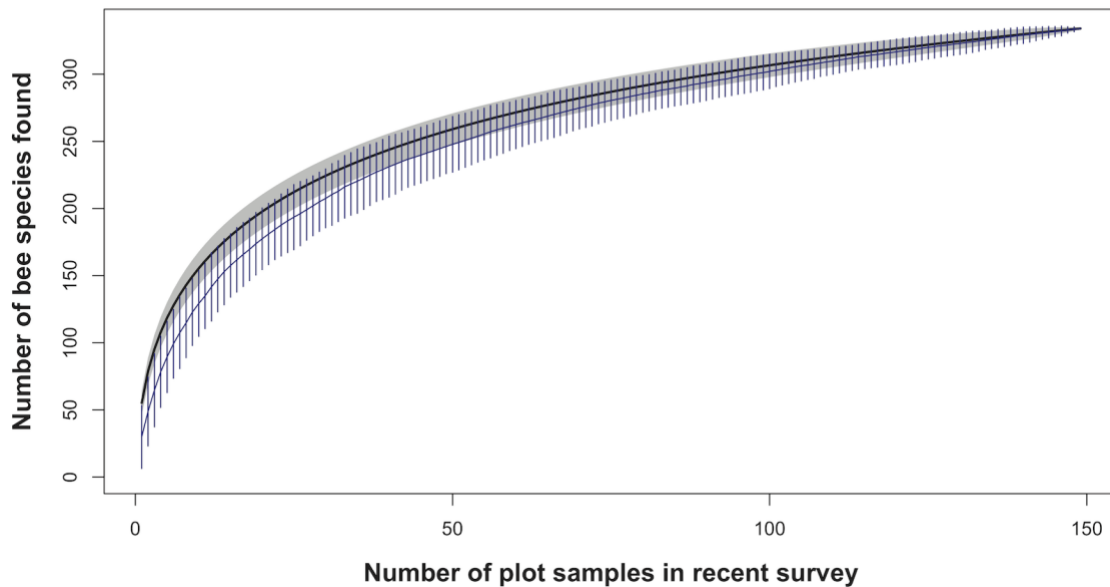

329

330 **Fig 3. Species accumulation curve.** Observed rate of accumulation of 334 species across 150  
331 samples (black line, grey 95% confidence interval bands) compared to an expected rate of  
332 species accumulation for a random community with the same number of species and samples  
333 (blue line and 95% confidence interval bars).

334

335 Bee species richness in 150 plot samples was normally distributed (Shapiro-Wilk  
336 normality test,  $p=0.8$ ) and positively related to the floral richness of bee-visited plants by a  
337 power-law linear regression model (Bee Richness =  $\exp(2.79 + 0.38 \cdot \log(\text{FR}))$ );  $R^2=0.37$ ,  $p<0.01$ ,  
338 S1a Fig). To a lesser extent, bee abundance (square-root transformed to normalize distribution)  
339 was also significantly positively correlated with the floral diversity of bee-visited plants in plot  
340 samples (Bee Abundance =  $\exp(2.26 + 0.23 \cdot \log(\text{FR}))$ );  $R^2 = 0.16$ ,  $p<0.01$ , S1b Fig).

341

342 Bee abundance, dominance, and floral activity varied between species and the two  
343 consecutive years of sampling at Pinnacles National Park. Across all 150 plot samples over two  
344 years, *Lasioglossum* (Halictidae) was the most abundant bee genus, followed by *Hesperapis*

344 (Melittidae), *Osmia* (Megachilidae), and *Halictus* (Halictidae). *Oreopasities*, *Peponapis*,  
345 *Xeromelecta*, and *Townsendiella* (all Apidae) were among the rarest genera collected over the  
346 two years of plot sampling; all but *Peponapis* are cleptoparasites.

347         Between years, rank abundance of the top twenty-five bee species reflects high  
348 interannual species turnover, with *Hesperapis regularis* (Melittidae) occupying the top spot in  
349 2011 and only ranking as the fourth most abundant species in 2012 (Table 3a). Similarly, *Osmia*  
350 *nemoris* (Megachilidae) was the most abundant species collected in plot samples at Pinnacles in  
351 2012, after having been ranked fifth most abundant in 2011. Halictidae was the bee family with  
352 the highest number of most abundant species in both years, followed by Megachilidae in 2011  
353 and Andrenidae in 2012 (Table 3a).

354         The most bee-popular plants also varied between years. In 2011, more bees visited  
355 *Clarkia unguiculata* (Onagraceae), the host plant of 2011's most abundant bee, *Hesperapis*  
356 *regularis*, than any other plant (N= 247, compared to 116 bees on this flower in 2012), and  
357 *Eriogonum fasciculatum* (Polygoneaceae) was visited by the most bees in 2012 (N = 644,  
358 compared to 109 bees on this flower in 2011) (Table 3b). *Adenostoma fasciculatum* (Rosaceae)  
359 and *Eschscholzia californica* (Papaveraceae) maintained their positions as the second and third  
360 most bee-popular plants, respectively, in both years of collecting. Floral species from the  
361 Boraginaceae family dominated the list of top twenty-five most bee-popular plants in 2011 and  
362 tied with Asteraceae and Fabaceae for most bee-popular family in 2012 (Table 3b). A broader  
363 examination of bee metrics across different habitat types can be found in Meiners 2016 [51].

364 **Table 3. Most commonly-collected bees and most bee-popular plants in 2011 and 2012**  
 365 **surveys at Pinnacles National Park.** (a) Twenty-five most commonly-collected bee species by  
 366 rank abundance per year. (b) Twenty-five most commonly recorded plants visited by bees,  
 367 ranked by popularity with bees per year. See S2 and S3 Tables for the complete taxa lists.

368 **(a)**

| During the 2011 flowering season |                     |                          |            | During the 2012 flowering season |                     |                          |
|----------------------------------|---------------------|--------------------------|------------|----------------------------------|---------------------|--------------------------|
| Bee Family                       | Genus               | Species                  | Rank Abun. | Bee Family                       | Genus               | Species                  |
| Melittidae                       | <i>Hesperapis</i>   | <i>regularis</i>         | 1          | Megachilidae                     | <i>Osmia</i>        | <i>nemoris</i>           |
| Halictidae                       | <i>Halictus</i>     | <i>tripartitus</i>       | 2          | Halictidae                       | <i>Halictus</i>     | <i>tripartitus</i>       |
| Halictidae                       | <i>Lasioglossum</i> | <i>nigrescens</i>        | 3          | Halictidae                       | <i>Lasioglossum</i> | <i>incompletum</i>       |
| Halictidae                       | <i>Lasioglossum</i> | <i>brunneiventre</i>     | 4          | Melittidae                       | <i>Hesperapis</i>   | <i>regularis</i>         |
| Megachilidae                     | <i>Osmia</i>        | <i>nemoris</i>           | 5          | Halictidae                       | <i>Halictus</i>     | <i>farinosus</i>         |
| Halictidae                       | <i>Lasioglossum</i> | <i>incompletum</i>       | 6          | Halictidae                       | <i>Lasioglossum</i> | <i>nigrescens</i>        |
| Apidae                           | <i>Apis</i>         | <i>mellifera</i>         | 7          | Apidae                           | <i>Melissodes</i>   | <i>stearnsi</i>          |
| Halictidae                       | <i>Lasioglossum</i> | <i>punctatoventre</i>    | 8          | Apidae                           | <i>Apis</i>         | <i>mellifera</i>         |
| Halictidae                       | <i>Halictus</i>     | <i>farinosus</i>         | 9          | Halictidae                       | <i>Lasioglossum</i> | <i>brunneiventre</i>     |
| Halictidae                       | <i>Lasioglossum</i> | <i>sp. 9</i>             | 10         | Halictidae                       | <i>Lasioglossum</i> | <i>punctatoventre</i>    |
| Halictidae                       | <i>Lasioglossum</i> | <i>imbrex</i>            | 11         | Apidae                           | <i>Eucera</i>       | <i>actuosa</i>           |
| Apidae                           | <i>Ceratina</i>     | <i>arizonensis</i>       | 12         | Andrenidae                       | <i>Panurginus</i>   | <i>gracilis</i>          |
| Andrenidae                       | <i>Andrena</i>      | <i>aff. cerasifolii</i>  | 13         | Halictidae                       | <i>Agapostemon</i>  | <i>angelicus/texanus</i> |
| Andrenidae                       | <i>Andrena</i>      | <i>sp.</i>               | 14         | Halictidae                       | <i>Lasioglossum</i> | <i>sp. 9</i>             |
| Halictidae                       | <i>Agapostemon</i>  | <i>angelicus/texanus</i> | 15         | Apidae                           | <i>Diadasia</i>     | <i>bituberculata</i>     |
| Andrenidae                       | <i>Andrena</i>      | <i>crudeni</i>           | 16         | Apidae                           | <i>Melissodes</i>   | <i>sp.</i>               |
| Halictidae                       | <i>Lasioglossum</i> | <i>nevadense</i>         | 17         | Andrenidae                       | <i>Perdita</i>      | <i>distropica</i>        |
| Megachilidae                     | <i>Protosmia</i>    | <i>rubifloris</i>        | 18         | Halictidae                       | <i>Lasioglossum</i> | <i>sp.</i>               |
| Apidae                           | <i>Eucera</i>       | <i>actuosa</i>           | 19         | Andrenidae                       | <i>Andrena</i>      | <i>aff. cerasifolii</i>  |
| Megachilidae                     | <i>Osmia</i>        | <i>brevis</i>            | 20         | Megachilidae                     | <i>Osmia</i>        | <i>aglaia</i>            |
| Andrenidae                       | <i>Panurginus</i>   | <i>gracilis</i>          | 21         | Megachilidae                     | <i>Osmia</i>        | <i>regulina</i>          |
| Halictidae                       | <i>Lasioglossum</i> | <i>sisymbrii</i>         | 22         | Halictidae                       | <i>Lasioglossum</i> | <i>nevadense</i>         |
| Apidae                           | <i>Diadasia</i>     | <i>angusticeps</i>       | 23         | Andrenidae                       | <i>Andrena</i>      | <i>macrocephala</i>      |
| Megachilidae                     | <i>Trachusa</i>     | <i>perdita</i>           | 24         | Andrenidae                       | <i>Andrena</i>      | <i>w-scripta</i>         |
| Megachilidae                     | <i>Osmia</i>        | <i>regulina</i>          | 25         | Apidae                           | <i>Ceratina</i>     | <i>arizonensis</i>       |

369 (b)

| During the 2011 flowering season       |               |             | During the 2012 flowering season     |                |
|----------------------------------------|---------------|-------------|--------------------------------------|----------------|
| <i>Plant Name</i>                      | Plant Family  | Popul. Rank | <i>Plant Name</i>                    | Plant Family   |
| <i>Clarkia unguiculata</i>             | Onagraceae    | 1           | <i>Eriogonum fasciculatum</i>        | Polygonaceae   |
| <i>Adenostoma fasciculatum</i>         | Rosaceae      | 2           | <i>Adenostoma fasciculatum</i>       | Rosaceae       |
| <i>Eschscholzia californica</i>        | Papaveraceae  | 3           | <i>Eschscholzia californica</i>      | Papaveraceae   |
| <i>Clarkia purpurea</i>                | Onagraceae    | 4           | <i>Clarkia unguiculata</i>           | Onagraceae     |
| <i>Chaenactis glabriuscula</i>         | Asteraceae    | 5           | <i>Hirschfeldia incana</i>           | Brassicaceae   |
| <i>Lotus scoparius var.scoparius</i>   | Fabaceae      | 6           | <i>Marrubium vulgare</i>             | Lamiaceae      |
| <i>Ranunculus californicus</i>         | Ranunculaceae | 7           | <i>Eriodictyon tomentosum</i>        | Boraginaceae   |
| <i>Eriogonum fasciculatum</i>          | Polygonaceae  | 8           | <i>Chaenactis glabriuscula</i>       | Asteraceae     |
| <i>Hirschfeldia incana</i>             | Brassicaceae  | 9           | <i>Amsinckia menziesii</i>           | Boraginaceae   |
| <i>Salix exigua</i>                    | Salicaceae    | 10          | <i>Salix lasiolepis</i>              | Salicaceae     |
| <i>Lupinus albifrons</i>               | Fabaceae      | 11          | <i>Clarkia purpurea</i>              | Onagraceae     |
| <i>Vicia villosa</i>                   | Fabaceae      | 12          | <i>Lasthenia californica</i>         | Asteraceae     |
| <i>Eriodictyon tomentosum</i>          | Boraginaceae  | 13          | <i>Lupinus albifrons</i>             | Fabaceae       |
| <i>Viola pedunculata</i>               | Violaceae     | 14          | <i>Calochortus venustus</i>          | Liliaceae      |
| <i>Quercus agrifolia var.agrifolia</i> | Fagaceae      | 15          | <i>Ceanothus cuneatus</i>            | Rhamnaceae     |
| <i>Lasthenia californica</i>           | Asteraceae    | 16          | <i>Chorizanthe douglasii</i>         | Polygonaceae   |
| <i>Marrubium vulgare</i>               | Lamiaceae     | 17          | <i>Erodium cicutarium</i>            | Geraniaceae    |
| <i>Pholistoma auritum</i>              | Boraginaceae  | 18          | <i>Salix exigua</i>                  | Salicaceae     |
| <i>Arctostaphylos pungens</i>          | Ericaceae     | 19          | <i>Penstemon heterophyllus</i>       | Plantaginaceae |
| <i>Amsinckia menziesii</i>             | Boraginaceae  | 20          | <i>Lotus scoparius var.scoparius</i> | Fabaceae       |
| <i>Ceanothus cuneatus</i>              | Rhamnaceae    | 21          | <i>Baccharis salicifolia</i>         | Asteraceae     |
| <i>Bloomeria crocea</i>                | Liliaceae     | 22          | <i>Vicia villosa</i>                 | Fabaceae       |
| <i>Heliotropium curassavicum</i>       | Boraginaceae  | 23          | <i>Malacothamnus aboriginum</i>      | Malvaceae      |
| <i>Erodium brachycarpum</i>            | Geraniaceae   | 24          | <i>Ranunculus californicus</i>       | Ranunculaceae  |
| <i>Salix lasiolepis</i>                | Salicaceae    | 25          | <i>Heliotropium curassavicum</i>     | Boraginaceae   |

370

## 371 Pinnacles bee biodiversity in context

372 To assess the bee biodiversity density at Pinnacles relative to other locations, we used  
 373 literature searches and expert opinions to compile a list of 23 studies within the United States  
 374 that matched our criteria for comparison (N > 100 species, extensive inventory-style sampling in

375 a natural area) (Table 4). It is worth visualizing that, while efforts to survey native bees have  
 376 increased in recent years, these published inventories still only cover a small proportion of  
 377 natural areas and habitat types across the United States, and thus offer only a small window into  
 378 the status of native bees across the country (Fig 4).

379

380 **Table 4. Bee biodiversity density results for all known native bee inventory projects with at**  
 381 **least 100 species in natural or semi-natural areas across the United States (N= 23).**

| Study location                                  | Study daates               | Species | Approx. total area (km <sup>2</sup> ) | References                                                  |
|-------------------------------------------------|----------------------------|---------|---------------------------------------|-------------------------------------------------------------|
| Grand Staircase Escalante National Monument, UT | 2000-2003                  | 656     | 7,610                                 | [43]                                                        |
| Clark County, NV                                | 1998; 2005, 2006           | 598     | 20,487                                | [40]                                                        |
| Yosemite National Park, CA                      | 2006-2009                  | 554     | 3028                                  | <i>pers. comm. T. Griswold</i>                              |
| Pinnacles National Park, CA                     | 1996-1999; 2002; 2011-2012 | 450     | 109                                   | <i>present results &amp; [42]</i>                           |
| San Bernardino, AZ <sup>a</sup>                 | 2000-2007                  | 383     | 1,088 <sup>a</sup>                    | [23]                                                        |
| Carlsbad Caverns National Park, NM              | 2010-2011                  | 364     | 189                                   | <i>pers. comm. T. Griswold</i>                              |
| Curlew Valley, ID                               | 1969-1974                  | 340     | 4,999                                 | <i>[59] &amp; updated totals by pers. comm. T. Griswold</i> |
| San Rafael Desert, UT                           | 1979-1992                  | 333     | 5,180                                 | [60]                                                        |
| Mojave National Preserve, CA                    | 1975-1995                  | 305     | 6,475                                 | <i>pers. comm. T. Griswold</i>                              |
| Black Hills of SD and WY                        | 2010-2011                  | 290     | 12,950                                | [46]                                                        |
| Carlinville, IL <sup>a</sup>                    | 1884-1916                  | 288     | 256 <sup>a</sup>                      | [23]                                                        |
| Plummers Island, MD <sup>b</sup>                | 1920s-2006                 | 232     | 0.15                                  | [61]                                                        |
| MPG Ranch, MT                                   | 2013-2015                  | 229     | 39                                    | [62]                                                        |
| Indiana Dunes, IN                               | 2003, 2004; 2010           | 204     | 60                                    | [63]                                                        |
| Albany County, WY <sup>a</sup>                  | 1995-1996                  | 200     | 11,160 <sup>a</sup>                   | [64]                                                        |
| Palouse Prairie, ID                             | 2012-2013                  | 174     | 2,122                                 | [65]                                                        |
| Dugway Proving Ground, UT <sup>a</sup>          | 2003, 2005                 | 163     | 3,243 <sup>a</sup>                    | [45]                                                        |
| Channel Islands, CA                             | Not specified              | 154     | 904                                   | [66]                                                        |
| Black Rock Forest Preserve, NY                  | 2003                       | 144     | 15.5                                  | [47]                                                        |
| Tonasket Ranger District, WA <sup>a</sup>       | 2004                       | 140     | 1,678 <sup>a</sup>                    | [67]                                                        |
| Black Belt Prarie, MS <sup>a</sup>              | 1991-2001                  | 118     | 803 <sup>a</sup>                      | [68]                                                        |
| Archibold Biol. Station, FL                     |                            | 113     | 21                                    | [69]                                                        |
| Hattiesburg, MS <sup>a</sup>                    | 1943-1944                  | 104     | 140 <sup>a</sup>                      | [70]                                                        |

382 <sup>a</sup>Area sizes not specified by publication or through author communications were estimated by calculating  
 383 known size of map area named in study.

384 <sup>b</sup>The Plummer's Island study was eliminated as an outlier in the species-area relationship shown in Fig 5  
 385 because of its extremely restricted area size sampled compared to other studies.



386

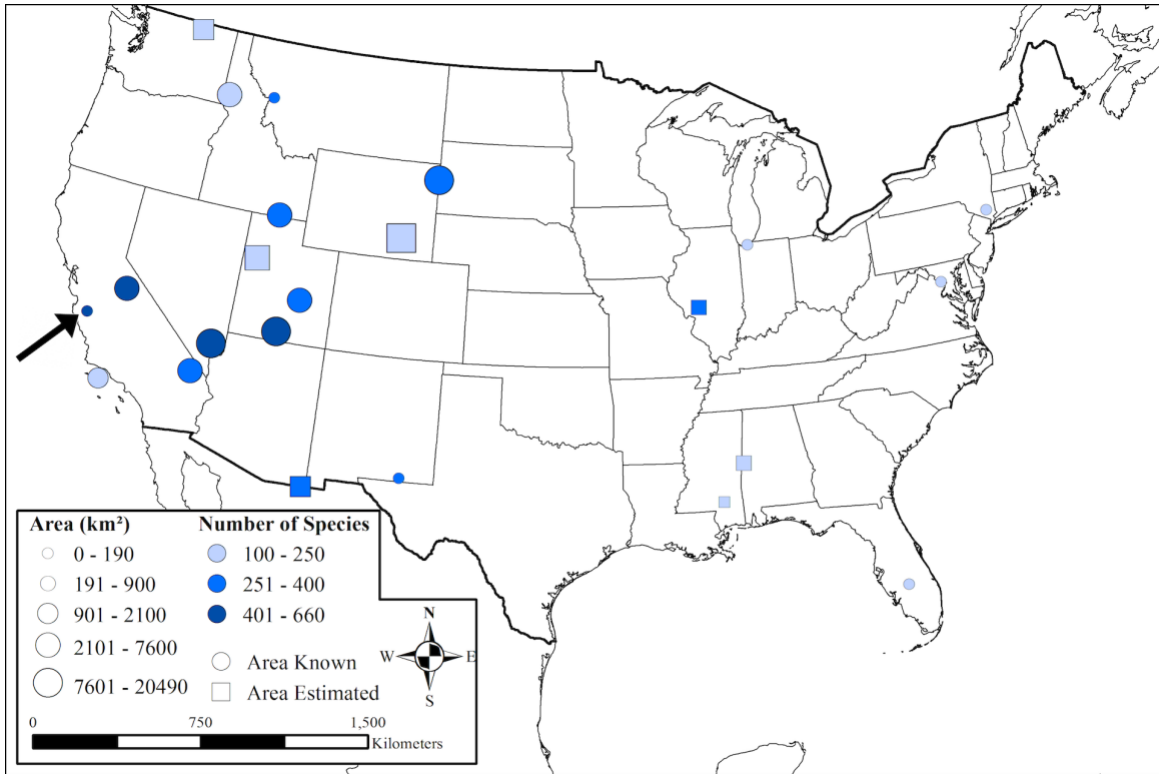

387

388 **Fig 4. Map of the location, size, and number of bee species recorded for all exhaustive bee**  
389 **inventory efforts undertaken across the United States for which data is published or**  
390 **reported.** The black arrow points to Pinnacles National Park. See Table 4 for project details.

391

392 Without controlling for the area sampled, Pinnacles' 450 bee species place it fourth  
393 among 23 completed studies reporting high numbers of bee species within a natural area. Studies  
394 with more total bee species include Grand Staircase Escalante National Monument, where OMC  
395 recorded 656 different species of bees between 2000-2003 [43], a study conducted by TLG in  
396 Clark County, Nevada that documented 598 bee species over three years [40], and an  
397 unpublished study in Yosemite National Park in the mid-2000s that found 554 species (*Griswold,*  
398 *unpublished data*). A variety of additional systematic inventories conducted in natural lands also  
399 report high bee biodiversity, including 393 bee species found over seven years in San Bernardino  
400 Valley, Arizona [23], previously thought to have the highest biodiversity of native bees by area.

401 A meaningful biodiversity comparison between this list of bee inventories is hindered by  
 402 the vastly different areas each covers. A more direct comparison of the biodiversity of different  
 403 surveys requires accounting for these differences in area. Because species richness does not scale  
 404 linearly with spatial area [71,72], we plotted a power-law species-area relationship based on the  
 405 reported species richness and area covered by known bee inventories (Table 4) to calculate  
 406 which of the 23 listed studies found lower-than-expected bee richness based on their size and  
 407 which studies were likely true hotspots of native bee biodiversity (Fig 5).

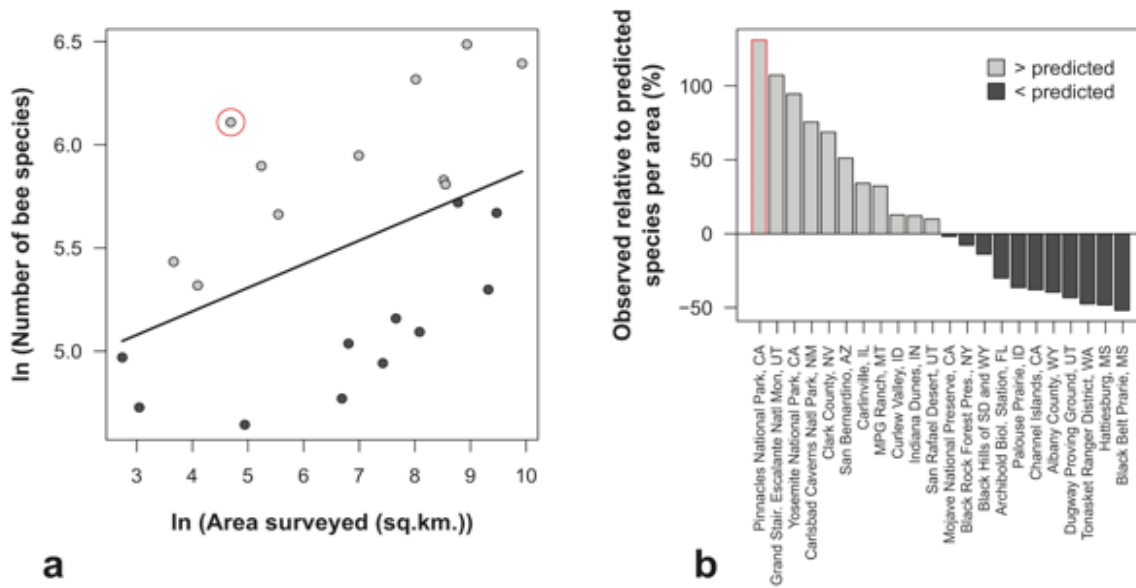

408 **Fig 5. Species-Area relationships and trend line for all major, exhaustive bee inventory**  
 409 **studies conducted in the United States in natural or semi-natural habitats.** (a) The black  
 410 trend line delineates expectations for how the number of species will increase with increasing  
 411 area size based on the (log-transformed) species-area relationship. Studies above the trend line  
 412 (grey points) recorded more bee species than expected for the area of the site; those below the  
 413 line (black points) recorded fewer bee species than might be expected on average for that size  
 414 area. Pinnacles National Park is circled in red. (b) Barplot of the difference in the number of bee  
 415 species observed in each study relative to the number of bee species predicted by the trend line  
 416 plotted in panel (a). Pinnacles National Park is outlined in red. Study details are listed in Table 4.

418           Based on this difference between observed and expected species richness per area (the  
419 positive or negative distance of the point to the trend line in Fig 5), we conclude that Pinnacles  
420 National Park is home to the highest bee biodiversity per area surveyed of any published or  
421 known exhaustive bee biodiversity survey (with over 100 species) in natural areas across the  
422 United States. Grand Staircase Escalante National Monument (GSENM) also contains more bee  
423 biodiversity than would be expected by even its vast size, as does Yosemite National Park;  
424 Carlsbad Caverns National Park; Clark County, Nevada; San Bernardino, Arizona; Carlinville,  
425 Illinois; MPG Ranch, Montana; Curlew Valley, Idaho; Indiana Dunes, Indiana; and San Rafael  
426 Desert, Utah. Studies that reported bee biodiversity lower than what would be expected by our  
427 species-area relationship included Black Belt Prairie, Missouri; Hattiesville, Missouri; Tonasket  
428 Ranger District, Washington; and the Black Hills of South Dakota and Wyoming, among other  
429 natural areas (Fig 5, Table 4). Many more studies will be necessary to fill in the map of bee  
430 biodiversity in natural areas (Fig 4) and interpret how the bee species-area relationship relates to  
431 ecosystem, climate, or habitat stage (Fig 5).

432

## 433 **Discussion**

434           Wild, native bees are key ecosystem service providers in both natural and agricultural  
435 landscapes [5–7,73]. Compared to the unstable European honey bee, on which United States  
436 agriculture is heavily dependent, little is known about the four thousand North American species  
437 of native bees, who may also be vulnerable to the same parasites, pesticides, and habitat  
438 modification plaguing the honey bee [3,16,17,34,74,75]. One of the reasons for this lack of  
439 attention to native pollinators is the expense, time, and skill required to collect and identify  
440 native bees, which are spatiotemporally variable, short-lived, diverse in their taxonomy and  
441 nesting habits, and often difficult to see. Even when extensive bee inventories are conducted at

442 intensities and intervals sufficient to capture local diversity in native bees, our literature review  
443 found that they are rarely replicated later, resulting in few datasets that allow for robust  
444 assessment of trends in native bee populations over ecologically relevant time scales.

445         With three separate inventories conducted over three decades, the native bee inventory  
446 efforts at Pinnacles National Park in the Inner South Coast Range of California represent an  
447 exception to this lack of temporal knowledge. Combined results from seven years of sampling  
448 suggest that Pinnacles National Park may harbor the highest density of bee species currently  
449 known anywhere in the United States, and potentially the world, since California is already  
450 recognized as a global bee biodiversity hotspot [20]. In comparison to Pinnacles' 450 species  
451 across an area of 109km<sup>2</sup>, only 388 species of bees have been recorded in the state of Wisconsin  
452 and only 40 species on the entire two large islands of New Zealand [76,77]. The closest  
453 comparison by habitat type outside of the United States may be a survey conducted 1983-1987  
454 over a Mediterranean area of unspecified size outside Athens, Greece that reported 661 species  
455 of bees [78]. A survey of seven California urban areas recorded between 60 and 80 total bee  
456 species [73]. However, the fact that substantial species diversity was added to the bee inventory  
457 list for Pinnacles even after five prior years of surveys (Figs 2b and 3) suggests that inventories  
458 in other locations over shorter timespans may grossly undercount rare species.

459         Our comparison of the bee biodiversity at Pinnacles with other exhaustive bee surveys  
460 conducted in the continental United States supports previous assertions that Pinnacles National  
461 Park is home to an exceptionally high density of bee species. We attribute the extraordinarily  
462 rich bee fauna of Pinnacles National Park to its Mediterranean climate, steep environmental  
463 gradients, and high habitat heterogeneity, the last of which has been found in other research to be  
464 a stronger predictor of species richness than the species-area relationship [79,80]. Habitat  
465 heterogeneity can occur over both space and time. Mediterranean habitats, including those at

466 Pinnacles, are known for rich ‘flash-bloom’ cycles during spring months, followed by hot, dry  
467 summers and mild, wet winters, an environment that tends to support a high biodiversity of many  
468 taxa by creating many temporal habitat niches [9,81]. Among bees, the rapid turnover of floral  
469 resources in these areas may favor solitary species, whose shorter flight periods and more  
470 specialized foraging behaviors may allow many species to coexist in a single area, as each  
471 occupies a narrower temporal and foraging niche space than longer-lived social or generalist  
472 species, which are more common in temperate areas [19,23]. This variability in bee species over  
473 time at Pinnacles (Fig 2a) underscores the the importance of long-term sampling to meet the  
474 research challenge of detecting the signal amidst the noise of bee community variability [82].

475         Across space, habitats at Pinnacles change rapidly from the western, coastally-influenced  
476 slopes, up the 500m elevational gradient to the rock ridge, and down the different aspects and  
477 microclimates of the drier east side. Pinnacles spans several fault lines, the geologic movements  
478 of which may have contributed to its elevational variation and broader array of soil types than  
479 would typically be found in such a small area [83]. Perhaps because of this soil heterogeneity,  
480 Pinnacles is also considered to be a transitional zone between the floral ecotones of northern and  
481 southern California [84] and boasts a plant list of nearly 700 species, many of them flowering  
482 [85]. We found bee richness to be highly correlated with the richness of bee-visited angiosperms  
483 on any given day and site at Pinnacles (S1 Fig), which corroborates results from previous studies  
484 [9,43]. Indeed, our conclusion is that the extraordinary diversity of native bees at Pinnacles is a  
485 function of the dynamic climate, rich wildflower flora, and landscape patchiness creating a wide  
486 array of spatiotemporal habitat niches. These factors may allow more diverse bee communities to  
487 coexist across space than has been found anywhere else.

488         The unparalleled biodiversity of native bees at Pinnacles National Park is especially  
489 intriguing given its juxtaposition with nearby agricultural intensity. Salinas Valley, at the

490 doorstep of Pinnacles National Park, produces most of the strawberries, tomatoes, spinach,  
491 lettuce, celery, and garlic for the country, along with many smaller crops. Many of the lands  
492 surrounding the park that are not irrigated for crops are grazed by cows, which may reduce  
493 available floral diversity for bees [86]. Native bees are most diverse in natural, undisturbed areas,  
494 proximity to which has been linked to crop pollination success because of the constant influx of  
495 wild pollinating insect populations into arated lands inhospitable to long-term residence [11,13].  
496 Agricultural habitats fail to support diverse native bees due to impacts of pesticides, nutritional  
497 deficits resulting from monocultures offering only one type of bloom, and practices of tilling and  
498 turning over the soil where many native bee species overwinter [5,30,87]. The native bees known  
499 to pollinate crops persist not within the fields but in nearby patches of natural, uncultivated land.  
500 California has increased efforts to restore habitat for wild bees in agricultural lands. But less  
501 attention has been paid to bee source populations in adjacent natural areas, even though source-  
502 sink dynamics have recently been determined to influence bee population sensitivity to decline  
503 [88]. To date, no measures of bee exchange between Pinnacles and nearby croplands are  
504 available, but such data would help define the beneficial halo of bee biodiversity hotspots.

505         If Pinnacles National Park is indeed a biological refuge for native bee populations within  
506 a highly-altered landscape, it will be even more important to track trends in its bee biodiversity  
507 over time. Our establishment of ten 1-hectare plots and repeatable methodology will facilitate  
508 ongoing monitoring activities and better comparisons of bee biodiversity and population stability  
509 over time than are currently possible. During 2011 and 2012, we recorded 355 species of bees at  
510 Pinnacles National Park, 48 of which were new records for the park. Initial inventories in the  
511 1990s recorded 382 species, 95 of which we did not encounter during the recent inventory. After  
512 six prior years of sampling and a clear leveling of the species accumulation curve, we still  
513 recorded three new genera in 2012. These results illustrate the difficulty in deciphering

514 ecological trends from inventories conducted using different methods or in different locations.  
515 Long-term, systematic monitoring studies in consistent locations will enable improved  
516 understanding of species turnover, range extensions (invasions), local extinctions, baseline states,  
517 and how to differentiate natural community variability from bee biodiversity decline, a question  
518 we consider a research priority towards assessing pollinator trajectories.

519         The need for multi-year, temporally replicated bee surveys to better quantify trends and  
520 declines in native bees over time is further highlighted by the recent increase in the use of  
521 chronosequences, which substitute space as a proxy for time in restored habitats to model  
522 changes in native bee dynamics [89,90]. This is a clever approach but increasing efforts to repeat  
523 surveys using the same methodology in the same natural areas over actual timespans would be  
524 better. Spatial coverage of published bee inventory studies is sparse (Fig 5), and temporal  
525 coverage is worse. Expanding long-term bee biodiversity monitoring to additional habitats and  
526 supporting the museum work and collection maintenance that enable temporal comparisons will  
527 bolster our chances of protecting native bees and agricultural stability.

528

## 529 **Conclusions**

530         Here we reported details of the third extensive bee inventory effort at Pinnacles National  
531 Park in California over multiple decades in order to share ongoing findings from a native bee  
532 biodiversity hotspot and to highlight the need for additional studies that evaluate temporal trends  
533 among pollinators. We are the first to compile and compare similar information on native bee  
534 biodiversity from published surveys of natural areas across the United States. With 450 species  
535 of native bees, we found that Pinnacles houses a higher density of species than any other natural  
536 area studied or than would be expected by the species-area curve, but that this result may be  
537 partially due to its high sampling intensity over time. Nevertheless, currently our results indicate

538 that America's newest national park may be a substantial exporter of free, native pollinators into  
539 economically-valuable agricultural lands as well as neighboring semi-wild lands. Only by  
540 comparing natural and disturbed areas over time to quantify the relative impacts of activities  
541 such as urbanization and agricultural intensification separate from more pervasive pressures like  
542 climate change, as is a goal of climate change vulnerability assessments [82], will we be able to  
543 determine the best multi-pronged approach to mitigating native bee declines. Our discovery that  
544 Pinnacles is the only area to have been extensively and repeatedly surveyed for bee biodiversity  
545 over multiple decades further underscores our call for increased repeated monitoring efforts to  
546 facilitate research on bee population decline and variability at its source.

547

## 548 **Acknowledgements**

549 We are grateful to Therese Lamperty for dedication in the field, and to Harold Ikerd and  
550 Skyler Burrows for assistance in the lab. This work would not have been possible without  
551 generous guidance from USU co-P.I. Edward W. Evans and from Pinnacles wildlife biologist  
552 Paul G. Johnson. We thank Michael Orr, Skyler Burrows, Harold Ikerd, Karen Wright, Zachary  
553 Portman, Brian Rozick, and Ethan Frehner for help with bee identifications; Valerie Nuttman,  
554 Brent Johnson, and Denise Louie for support at Pinnacles; Amy Fesnock for her 2002 work on  
555 Pinnacles bees; Morgan Ernest, Paul Johnson, Eugene Schupp, Hao Ye, Erica Christensen, and  
556 Kenny Anderson for comments on drafts; Jereme Gaeta, Cody Griffin, and Audrey Wilson for  
557 assistance with figures; and our PlosONE editor for instructions that improved the manuscript.

558



## 559 **References**

- 560 1. Ollerton J, Winfree R, Tarrant S. How many flowering plants are pollinated by animals?  
561 *Oikos*. 2011;120: 321–326. doi:10.1111/j.1600-0706.2010.18644.x
- 562 2. Michener CD. *The Bees of the World*. Baltimore: Johns Hopkins University Press; 2007.
- 563 3. Morse R, Calderone NW. The value of honey bees as pollinators of U.S. Crops in 2000.  
564 *Bee Cult*. 2001;128. Available: [http://agris.fao.org/agris-](http://agris.fao.org/agris-search/search.do?recordID=XE20122002449)  
565 [search/search.do?recordID=XE20122002449](http://agris.fao.org/agris-search/search.do?recordID=XE20122002449)
- 566 4. Losey JE, Vaughan M. The Economic Value of Ecological Services Provided by Insects.  
567 *BioScience*. 2006;56: 311–323. doi:10.1641/0006-3568(2006)56[311:TEVOES]2.0.CO;2
- 568 5. Winfree R, Williams NM, Dushoff J, Kremen C. Native bees provide insurance against  
569 ongoing honey bee losses. *Ecol Lett*. 2007;10: 1105–1113. doi:10.1111/j.1461-  
570 0248.2007.01110.x
- 571 6. Garibaldi LA, Steffan-Dewenter I, Winfree R, Aizen MA, Bommarco R, Cunningham SA,  
572 et al. Wild Pollinators Enhance Fruit Set of Crops Regardless of Honey Bee Abundance.  
573 *Science*. 2013;339: 1608–1611. doi:10.1126/science.1230200
- 574 7. Greenleaf SS, Kremen C. Wild bees enhance honey bees' pollination of hybrid sunflower.  
575 *Proc Natl Acad Sci*. 2006;103: 13890–13895. doi:10.1073/pnas.0600929103
- 576 8. Tepedino VJ. The importance of bees and other insect pollinators in maintaining floral  
577 species composition. *Gt Basin Nat Mem*. 1979; 139–150.
- 578 9. Potts SG, Vulliamy B, Dafni A, Ne'eman G, Willmer P. Linking Bees and Flowers: How  
579 Do Floral Communities Structure Pollinator Communities? *Ecology*. 2003;84: 2628–2642.  
580 doi:10.2307/3450108
- 581 10. Cane JH, Minckley RL, Kervin LJ, Roulston TH, Williams NM. Complex responses within  
582 a desert bee guild (Hymenoptera : Apiformes) to urban habitat fragmentation. *Ecol Appl*.  
583 2006;16: 632–644. doi:10.1890/1051-0761(2006)016[0632:CRWADB]2.0.CO;2
- 584 11. Kremen C, Williams NM, Bugg RL, Fay JP, Thorp RW. The area requirements of an  
585 ecosystem service: crop pollination by native bee communities in California. *Ecol Lett*.  
586 2004;7: 1109–1119. doi:10.1111/j.1461-0248.2004.00662.x
- 587 12. Tschardtke T, Steffan-Dewenter I, Kruess A, Thies C. Characteristics of insect populations  
588 on habitat fragments: A mini review. *Ecol Res*. 2002;17: 229–239. doi:10.1046/j.1440-  
589 1703.2002.00482.x
- 590 13. Öckinger E, Smith HG. Semi-natural grasslands as population sources for pollinating  
591 insects in agricultural landscapes. *J Appl Ecol*. 2007;44: 50–59. doi:10.1111/j.1365-  
592 2664.2006.01250.x

- 593 14. Morandin LA, Kremen C. Hedgerow restoration promotes pollinator populations and  
594 exports native bees to adjacent fields. *Ecol Appl.* 2013;23: 829–839. doi:10.1890/12-1051.1
- 595 15. Chaplin-Kramer R, Dombeck E, Gerber J, Knuth KA, Mueller ND, Mueller M, et al. Global  
596 malnutrition overlaps with pollinator-dependent micronutrient production. *Proc R Soc B.*  
597 2014;281: 20141799. doi:10.1098/rspb.2014.1799
- 598 16. Goulson D, Nicholls E, Botías C, Rotheray EL. Bee declines driven by combined stress  
599 from parasites, pesticides, and lack of flowers. *Science.* 2015;347: 1255957.  
600 doi:10.1126/science.1255957
- 601 17. Potts SG, Biesmeijer JC, Kremen C, Neumann P, Schweiger O, Kunin WE. Global  
602 pollinator declines: trends, impacts and drivers. *Trends Ecol Evol.* 2010;25: 345–353.  
603 doi:10.1016/j.tree.2010.01.007
- 604 18. Gonzalez VH, Griswold T, Engel MS. Obtaining a better taxonomic understanding of  
605 native bees: where do we start? *Syst Entomol.* 2013;38: 645–653. doi:10.1111/syen.12029
- 606 19. Linsley EG. The Ecology of Solitary Bees. *Hilgardia.* 1958;27: 543–599.
- 607 20. Michener CD. Biogeography of the bees. *Ann Mo Bot Gard.* 1979;66: 277–347.
- 608 21. Cardoso P, Erwin TL, Borges PAV, New TR. The seven impediments in invertebrate  
609 conservation and how to overcome them. *Biol Conserv.* 2011;144: 2647–2655.  
610 doi:10.1016/j.biocon.2011.07.024
- 611 22. Fischer AG. Latitudinal Variations in Organic Diversity. *Evolution.* 1960;14: 64–81.  
612 doi:10.2307/2405923
- 613 23. Minckley R. Faunal composition and species richness differences of bees (Hymenoptera:  
614 Apiformes) from two north American regions. *Apidologie.* 2008;39: 176–188.  
615 doi:10.1051/apido:2007062
- 616 24. Minckley RL, Roulston TH, Williams NM. Resource assurance predicts specialist and  
617 generalist bee activity in drought. *Proc R Soc B Biol Sci.* 2013;280.  
618 doi:10.1098/rspb.2012.2703
- 619 25. Williams N, Minckley R, Silveira F. Variation in native bee faunas and its implications for  
620 detecting community changes. *Conserv Ecol.* 2001;5: 1–24.
- 621 26. Bascompte J, Jordano P, Olesen J. Asymmetric coevolutionary networks facilitate  
622 biodiversity maintenance. *SCIENCE.* 2006;312: 431–433. doi:10.1126/science.1123412
- 623 27. Bascompte J, Jordano P, Melián CJ, Olesen JM. The nested assembly of plant–animal  
624 mutualistic networks. *Proc Natl Acad Sci.* 2003;100: 9383–9387.  
625 doi:10.1073/pnas.1633576100
- 626 28. Kremen C. Managing ecosystem services: what do we need to know about their ecology?  
627 *Ecol Lett.* 2005;8: 468–479. doi:10.1111/j.1461-0248.2005.00751.x

- 628 29. Larsen TH, Williams NM, Kremen C. Extinction order and altered community structure  
629 rapidly disrupt ecosystem functioning. *Ecol Lett.* 2005;8: 538–547. doi:10.1111/j.1461-  
630 0248.2005.00749.x
- 631 30. Williams NM, Crone EE, Roulston TH, Minckley RL, Packer L, Potts SG. Ecological and  
632 life-history traits predict bee species responses to environmental disturbances. *Biol*  
633 *Conserv.* 2010;143: 2280–2291. doi:10.1016/j.biocon.2010.03.024
- 634 31. Aizen MA, Sabatino M, Tylianakis JM. Specialization and Rarity Predict Nonrandom Loss  
635 of Interactions from Mutualist Networks. *Science.* 2012;335: 1486–1489.  
636 doi:10.1126/science.1215320
- 637 32. Bartomeus I, Ascher JS, Gibbs J, Danforth BN, Wagner DL, Hedtke SM, et al. Historical  
638 changes in northeastern US bee pollinators related to shared ecological traits. *Proc Natl*  
639 *Acad Sci.* 2013;110: 4656–4660. doi:10.1073/pnas.1218503110
- 640 33. Bommarco R, Biesmeijer JC, Meyer B, Potts SG, Pöyry J, Roberts SPM, et al. Dispersal  
641 capacity and diet breadth modify the response of wild bees to habitat loss. *Proc R Soc Lond*  
642 *B Biol Sci.* 2010; rspb20092221. doi:10.1098/rspb.2009.2221
- 643 34. Memmott J, Craze PG, Waser NM, Price MV. Global warming and the disruption of plant-  
644 pollinator interactions. *Ecol Lett.* 2007;10: 710–717. doi:10.1111/j.1461-  
645 0248.2007.01061.x
- 646 35. Forrest JRK, Thomson JD. An examination of synchrony between insect emergence and  
647 flowering in Rocky Mountain meadows. *Ecol Monogr.* 2011;81: 469–491. doi:10.1890/10-  
648 1885.1
- 649 36. Vilela AA, Del Claro VTS, Torezan-Silingardi HM, Del-Claro K. Climate changes  
650 affecting biotic interactions, phenology, and reproductive success in a savanna community  
651 over a 10-year period. *Arthropod-Plant Interact.* 2018;12: 215–227. doi:10.1007/s11829-  
652 017-9572-y
- 653 37. Meiners JM, Griswold TL, Harris DJ, Ernest SKM. Bees without Flowers: Before Peak  
654 Bloom, Diverse Native Bees Find Insect-Produced Honeydew Sugars. *Am Nat.* 2017;190:  
655 281–291. doi:10.1086/692437
- 656 38. Romero GQ, Gonçalves-Souza T, Kratina P, Marino NAC, Petry WK, Sobral-Souza T, et  
657 al. Global predation pressure redistribution under future climate change. *Nat Clim Change.*  
658 2018;8: 1087. doi:10.1038/s41558-018-0347-y
- 659 39. Cornelissen T. Climate change and its effects on terrestrial insects and herbivory patterns.  
660 *Neotrop Entomol.* 2011;40: 155–163. doi:10.1590/S1519-566X2011000200001
- 661 40. Griswold TL, Andres M, Andrus R, Garvin G, Keen K, Kervin L, et al. A survey of the rare  
662 bees of Clark County, Nevada. Final Rep Nat Conserv Las Vegas NV. 1999; Available:  
663 [http://works.bepress.com/terry\\_griswold/63](http://works.bepress.com/terry_griswold/63)

- 664 41. Marlin JC, LaBerge WE. The Native Bee Fauna of Carlinville, Illinois, Revisited After 75  
665 Years: a Case for Persistence. *Ecol Soc.* 2007; Available: <http://agris.fao.org/agris->  
666 [search/search.do?recordID=XE20122002329](http://agris.fao.org/agris-search/search.do?recordID=XE20122002329)
- 667 42. Messinger O, Griswold TL. A Pinnacle of bees. *Fremontia.* 2003;30: 32–40.
- 668 43. Messinger O. A survey of the bees of Grand Staircase-Escalante National Monument,  
669 Southern Utah: Incidence, Abundance, and Community dynamics. Masters of Science, Utah  
670 State University. 2006.
- 671 44. Roubik DW. Ups and downs in pollinator populations: When is there a decline? 2001;  
672 Available: <http://dlc.dlib.indiana.edu/dlc/handle/10535/3364>
- 673 45. Wilson JS, Messinger OJ, Griswold T. Variation between bee communities on a sand dune  
674 complex in the Great Basin Desert, North America: Implications for sand dune  
675 conservation. *J Arid Environ.* 2009;73: 666–671.
- 676 46. Drons DJ. An Inventory of Native Bees (Hymenoptera: Apiformes) in the Black Hills of  
677 South Dakota and Wyoming [Internet]. South Dakota State University. 2012. Available:  
678 [http://gfp.sd.gov/images/WebMaps/Viewer/WAP/Website/SWGSummaries/Drons%202012\\_an%20inventory%20of%20native%20Black%20Hills%20bees%20acknowledge.pdf](http://gfp.sd.gov/images/WebMaps/Viewer/WAP/Website/SWGSummaries/Drons%202012_an%20inventory%20of%20native%20Black%20Hills%20bees%20acknowledge.pdf)  
679
- 680 47. Giles V, Ascher JS. A survey of the bees of the Black Rock Forest preserve, New York  
681 (Hymenoptera: Apoidea). *J Hymenopt Res.* 2006;15: 208–231.
- 682 48. Moldenke AR. California pollination ecology and vegetation types. *Phytologia.* 1976;34:  
683 305–361.
- 684 49. Moldenke AR. Evolutionary history and diversity of the bee faunas of Chile and Pacific  
685 North America. *Wasmann J Biol.* 1976;34: 147–178.
- 686 50. Meiners JM, Griswold TL, Evans EW. Native Bees of Pinnacles National Park: Diversity  
687 Inventory and Plot Sampling Final Report and Sampling Manual. National Park Service;  
688 Utah State University; 2015 Sep p. 76.
- 689 51. Meiners JM. Biodiversity, Community Dynamics, and Novel Foraging Behaviors of a Rich  
690 Native Bee Fauna across Habitats at Pinnacles National Park, California. Masters of  
691 Science, Utah State University. 2016.
- 692 52. LeBuhn G, Griswold T, Minckley R, Droege S, Roulston T, Cane J, et al. A standardized  
693 method for monitoring bee populations—the bee inventory (BI) plot. 2003; Available:  
694 <http://cybercemetery.unt.edu/archive/nbii/20120111121317/http://online.sfsu.edu/~beepLOT/pdfs/Bee%20Plot%202003.pdf>  
695
- 696 53. Baldwin BG, Goldman DH. *The Jepson Manual: Vascular Plants of California.* University  
697 of California Press; 2012.
- 698 54. R Core Team. R: A language and environment for statistical computing. [https://www.R-](https://www.R-project.org)  
699 [project.org](https://www.R-project.org). Vienna, Austria; 2015.

- 700 55. Oksanen J, Blanchet FG, Friendly M, Kindt R, Legendre P, McGlenn D, et al. *vegan*:  
701 Community Ecology Package [Internet]. 2018. Available: [https://CRAN.R-](https://CRAN.R-project.org/package=vegan)  
702 [project.org/package=vegan](https://CRAN.R-project.org/package=vegan)
- 703 56. Arrhenius O. Species and Area. *J Ecol.* 1921;9: 95–99. doi:10.2307/2255763
- 704 57. Connor EF, McCoy ED. The Statistics and Biology of the Species-Area Relationship. *Am*  
705 *Nat.* 1979;113: 791–833. doi:10.1086/283438
- 706 58. Gotelli NJ, Colwell RK. Quantifying biodiversity: procedures and pitfalls in the  
707 measurement and comparison of species richness. *Ecol Lett.* 2001;4: 379–391.  
708 doi:10.1046/j.1461-0248.2001.00230.x
- 709 59. Bohart G, Knowlton G. The Bees of Curlew Valley (Utah and Idaho). *Proc Utah Acad Sci*  
710 *Arts Lett.* 1973; Available: [http://digitalcommons.usu.edu/piru\\_pubs/790](http://digitalcommons.usu.edu/piru_pubs/790)
- 711 60. Griswold T, Parker F, Tepedino V. The bees of the San Rafael Desert: Implications for the  
712 bee fauna of the Grand Staircase-Escalante National Monument. In: Hill LM, editor.  
713 Learning from the land: Grand Staircase Escalante National Monument Science  
714 Symposium Proceedings. 1998. pp. 175–186.
- 715 61. Brown JW, Bahr SM. The Insect (Insecta) Fauna of Plummers Island, Maryland: Brief  
716 Collecting History and Status of the Inventory. *Bull Biol Soc Wash.* 2008;15: 54–64.  
717 doi:10.2988/0097-0298(2008)15[54:TIIFOP]2.0.CO;2
- 718 62. Kuhlman M, Burrows S. Checklist of bees (Apoidea) from a private conservation property  
719 in west-central Montana. *Biodivers Data J.*
- 720 63. Grundel R, Jean RP, Frohnapple KJ, Gibbs J, Glowacki GA, Pavlovic NB. A Survey of  
721 Bees (Hymenoptera: Apoidea) of the Indiana Dunes and Northwest Indiana, USA. *J Kans*  
722 *Entomol Soc.* 2011;84: 105–138. doi:10.2317/JKES101027.1
- 723 64. Tepedino VJ, Stanton NL. Diversity and Competition in Bee-Plant Communities on Short-  
724 Grass Prairie. *Oikos.* 1981;36: 35–44. doi:10.2307/3544376
- 725 65. Rhoades PR, Griswold T, Ikerd H, Waits L, Bosque-Pérez N, Eigenbrode S. The native bee  
726 fauna of the Palouse Prairie (Hymenoptera: Apoidea). *J Melittology.* 2017;0: 1–20.  
727 doi:10.17161/jom.v0i66.5703
- 728 66. Rust R, Menke A, Miller D. A biogeographic comparison of the bees, sphecid wasps, and  
729 mealybugs of the California Channel Islands (Hymenoptera, Homoptera). *Entomology of*  
730 *the California Channel Islands: proceedings of the first symposium.* Santa Barbara, CA:  
731 Santa Barbara Museum of Natural History; 1985. pp. 22–59.
- 732 67. Wilson JS, Wilson LE, Loftis LD, Griswold T. The Montane Bee Fauna of North Central  
733 Washington, USA, with Floral Associations. *West North Am Nat.* 2010;70: 198–207.  
734 doi:10.3398/064.070.0206

- 735 68. Smith BA, Brown RL, Laberge W, Griswold T. A Faunistic Survey of Bees (Hymenoptera:  
736 Apoidea) in the Black Belt Prairie of Mississippi. *J Kans Entomol Soc.* 2012;85: 32–47.  
737 doi:10.2317/JKES111025.1
- 738 69. Deyrup M, Edirisinghe J, Norden B. The diversity and floral hosts of bees at the Archbold  
739 Biological Station, Florida (Hymenoptera: Apoidea). Available: [http://publikationen.uni-  
740 frankfurt.de/frontdoor/index/index/year/2013/docId/23868](http://publikationen.uni-frankfurt.de/frontdoor/index/index/year/2013/docId/23868)
- 741 70. Michener CD. Bees of a Limited Area in Southern Mississippi (Hymenoptera; Apoidea).  
742 *Am Midl Nat.* 1947;38: 443–455. doi:10.2307/2421575
- 743 71. Holt RD, Lawton JH, Polis GA, Martinez ND. Trophic Rank and the Species–Area  
744 Relationship. *Ecology.* 1999;80: 1495–1504. doi:10.1890/0012-  
745 9658(1999)080[1495:TRATSA]2.0.CO;2
- 746 72. Rosenzweig ML, L RM. Species Diversity in Space and Time. Cambridge University Press;  
747 1995.
- 748 73. Frankie GW, Thorp RW, Hernandez J, Rizzardi M, Ertter B, Pawelek JC, et al. Native bees  
749 are a rich natural resource in urban California gardens. *Calif Agric.* 2009;63: 113–120.  
750 doi:10.3733/ca.v063n03p113
- 751 74. USDA - National Agricultural Statistics Service - Honey Bee Surveys and Reports  
752 [Internet]. [cited 20 Nov 2016]. Available:  
753 [https://www.nass.usda.gov/Surveys/Guide\\_to\\_NASS\\_Surveys/Bee\\_and\\_Honey/](https://www.nass.usda.gov/Surveys/Guide_to_NASS_Surveys/Bee_and_Honey/)
- 754 75. Kremen C, Ricketts T. Global Perspectives on Pollination Disruptions. *Conserv Biol.*  
755 2000;14: 1226–1228.
- 756 76. Wolf AT, Ascher JS. Bees of Wisconsin (Hymenoptera: Apoidea: Anthophila). *Gt Lakes  
757 Entomol.* 2009;41.1: 129–168.
- 758 77. DONOVAN BJ. INTERACTIONS BETWEEN NATIVE AND INTRODUCED BEES IN  
759 NEW ZEALAND. *N Z J Ecol.* 1980;3: 104–116.
- 760 78. Petanidou T, Kallimanis AS, Tzanopoulos J, Sgardelis SP, Pantis JD. Long-term  
761 observation of a pollination network: fluctuation in species and interactions, relative  
762 invariance of network structure and implications for estimates of specialization. *Ecol Lett.*  
763 2008;11: 564–575. doi:10.1111/j.1461-0248.2008.01170.x
- 764 79. Báldi A. Habitat heterogeneity overrides the species–area relationship. *J Biogeogr.* 2008;35:  
765 675–681. doi:10.1111/j.1365-2699.2007.01825.x
- 766 80. Tews J, Brose U, Grimm V, Tielbörger K, Wichmann MC, Schwager M, et al. Animal  
767 species diversity driven by habitat heterogeneity/diversity: the importance of keystone  
768 structures: Animal species diversity driven by habitat heterogeneity. *J Biogeogr.* 2004;31:  
769 79–92. doi:10.1046/j.0305-0270.2003.00994.x

- 770 81. Klausmeyer KR, Shaw MR. Climate Change, Habitat Loss, Protected Areas and the  
771 Climate Adaptation Potential of Species in Mediterranean Ecosystems Worldwide. *PLoS*  
772 *ONE*. 2009;4: e6392. doi:10.1371/journal.pone.0006392
- 773 82. Foden WB, Young BE, Akçakaya HR, Garcia RA, Hoffmann AA, Stein BA, et al. Climate  
774 change vulnerability assessment of species. *Wiley Interdiscip Rev Clim Change*. 0: e551.  
775 doi:10.1002/wcc.551
- 776 83. Matthews VI. Correlation of Pinnacles and Neenach Volcanic Formations and Their  
777 Bearing on San Andreas Fault Problem. *AAPG Bull.* 1976;60: 2128–2141.
- 778 84. Tucker S, Knudsen K, Robertson J. Additional lichen collections from Pinnacles National  
779 Monument, San Benito County, California. *Bull Calif Lichen Soc.* 2006;13: 8–11.
- 780 85. NPS. Nature - Pinnacles National Park (U.S. National Park Service) [Internet]. 2015 [cited  
781 15 Nov 2015]. Available: <http://www.nps.gov/pinn/learn/nature/index.htm>
- 782 86. DeBano SJ. Effects of livestock grazing on aboveground insect communities in semi-arid  
783 grasslands of southeastern Arizona. *Biodivers Conserv.* 2006;15: 2547.  
784 doi:10.1007/s10531-005-2786-9
- 785 87. Winfree R, Aguilar R, Vázquez DP, LeBuhn G, Aizen MA. A meta-analysis of bees'  
786 responses to anthropogenic disturbance. *Ecology*. 2009;90: 2068–2076. doi:10.1890/08-  
787 1245.1
- 788 88. Iles DT, Williams NM, Crone EE. Source-sink dynamics of bumblebees in rapidly  
789 changing landscapes. *J Appl Ecol.* 2018;55: 2802–2811. doi:10.1111/1365-2664.13175
- 790 89. Griffin SR, Bruninga-Socolar B, Kerr MA, Gibbs J, Winfree R. Wild bee community  
791 change over a 26-year chronosequence of restored tallgrass prairie. *Restor Ecol.* 2017;  
792 doi:10.1111/rec.12481
- 793 90. Albrecht M, Riesen M, Schmid B. Plant-pollinator network assembly along the  
794 chronosequence of a glacier foreland. *Oikos*. 2010;119: 1610–1624. doi:10.1111/j.1600-  
795 0706.2010.18376.x

796

## 797 Supporting Information

### 798 S1 Table. Pinnacles National Park long-term bee monitoring site details.

| Site/Plot Number | Site/Plot Name      | GPS lat/long      | Elevation | Dimensions  | Habitat Type      |
|------------------|---------------------|-------------------|-----------|-------------|-------------------|
| 1                | McCabe Canyon Upper | 36.5081, -121.156 | 410m      | 175 m x 57m | Alluvial          |
| 2                | McCabe Canyon Lower | 36.503, -121.156  | 395m      | 175m x 57m  | Alluvial          |
| 3                | Peaks View          | 36.4802, -121.16  | 290m      | 200m x 50m  | Alluvial          |
| 4                | South Wilderness    | 36.4683, -121.156 | 280m      | 250m x 40m  | Live Oak Woodland |
| 5                | Needlegrass BOW     | 36.5091, -121.12  | 385m      | 200m x 50m  | Blue Oak Woodland |
| 6                | Needlegrass LOW     | 36.509, -121.129  | 365m      | 200m x 50m  | Live Oak Woodland |
| 7                | West Gate           | 36.4747, -121.227 | 610m      | 175m x 57m  | Blue Oak Woodland |
| 8                | Double Gates        | 36.4858, -121.232 | 535m      | 200m x 50m  | Grassland         |
| 9                | W. North Wilderness | 36.4949, -121.211 | 430m      | 200m x 50m  | Grassland         |
| 10               | High Peaks          | 36.4907, -121.183 | 595m      | 175m x 50m  | Blue Oak Woodland |

799



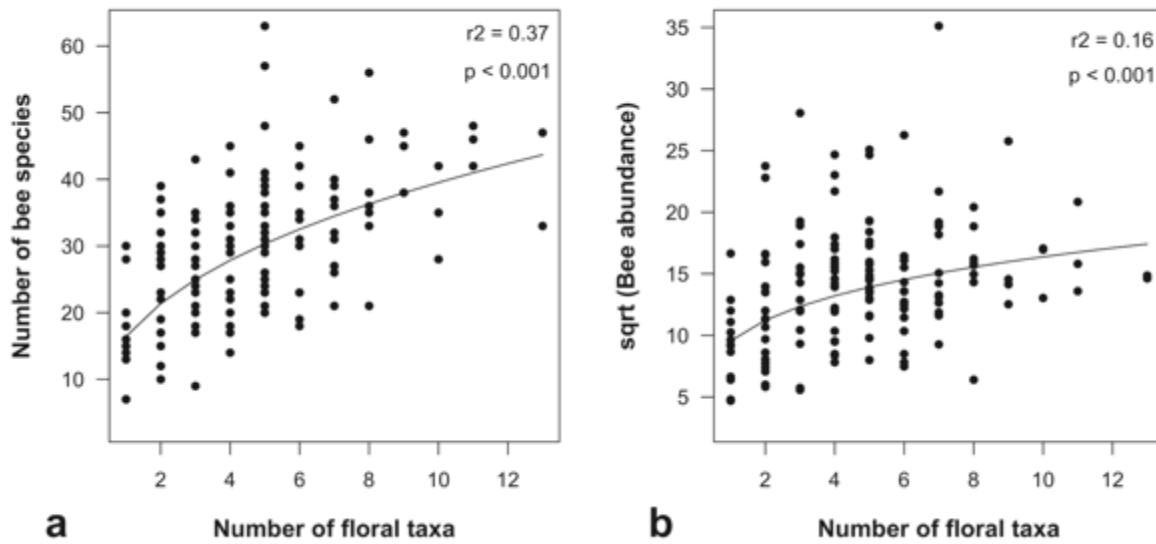

800

801 **S1 Fig. Relationship between floral richness (FR) and either (a) bee richness (BR) or (b)**

802 **bee abundance (BA, square-root transformed) at the plot-sample level (N=150) within**

803 **Pinnacles National Park (2011-12).** Shown with power-law model (black line; (a) BR =

804  $\exp(2.79 + 0.38 \cdot \log(\text{FR}))$ ;  $R^2=0.37$ ,  $p<0.01$ ; (b) BA =  $\exp(2.26 + 0.23 \cdot \log(\text{FR}))$ ;  $R^2 = 0.16$ ,

805  $p<0.01$ ).

806 **S2 Table. Full Pinnacles National Park bee species list, with relative abundance for each of**  
 807 **seven collection years, proportion of years collected, and status as new (N) to or absent (A)**  
 808 **from the current study.** Species are marked "S" for Singleton if only one specimen was  
 809 collected, "R" for Rare if  $N \leq 10$ , and "C" for Common if  $N > 10$ . Dashed vertical line marks 2002  
 810 collection as separate from original 1996-9 inventory, but still prior to recent study (2011-12).

| Bee Taxonomy |              |                |                | Early Inventory |      | Bowls<br>2002 | Recent Inventory |      | Prop. years Present | New/ Absent in 2011-12 |      |      |
|--------------|--------------|----------------|----------------|-----------------|------|---------------|------------------|------|---------------------|------------------------|------|------|
|              |              |                |                | 1996            | 1997 |               | 1998             | 1999 |                     |                        | 2011 | 2012 |
| Family       | Genus        | Subgenus       | Species        |                 |      |               |                  |      |                     |                        |      |      |
| Andrenidae   | Ancylandrena |                | atoposoma      | S               |      |               |                  |      | 0.14                | A                      |      |      |
|              | Andrena      | (Anchandrena)  | quercina       |                 |      | R             |                  | R    | R                   | 0.43                   |      |      |
|              |              | (Belandrena)   | nemophilae     |                 |      |               | R                |      | S                   | R                      | 0.43 |      |
|              |              |                | palpalis       |                 | R    | R             |                  |      |                     |                        | 0.29 | A    |
|              |              | (Cremnandrena) | anisochlora    |                 |      | C             |                  | C    | R                   | 0.43                   |      |      |
|              |              | (Dasyandrena)  | cristata       |                 |      | R             |                  |      |                     | 0.14                   | A    |      |
|              |              | (Derandrena)   | arctostaphylae |                 |      | S             |                  | S    |                     | 0.29                   | A    |      |
|              |              |                | californiensis |                 |      | R             |                  | S    | R                   | 0.57                   |      |      |
|              |              |                | n. sp.         |                 | S    | S             | R                |      | R                   | C                      | 0.71 |      |
|              |              |                | vandykei       |                 |      |               | C                |      | S                   |                        | 0.43 |      |
|              |              |                | viridissima    |                 |      |               |                  |      | R                   |                        | 0.14 | N    |
|              |              | (Diandrena)    | apasta         |                 |      |               |                  | S    |                     | 0.14                   | A    |      |
|              |              |                | chalybioides   |                 |      |               |                  |      | S                   | 0.14                   | N    |      |
|              |              |                | cuneilabris    |                 |      |               |                  |      | S                   | 0.14                   | N    |      |
|              |              |                | lewisorum      |                 | S    | R             | S                | C    |                     | C                      | 0.86 |      |
|              |              |                | nothocalaidis  |                 |      |               | S                |      |                     |                        | 0.14 | A    |
|              |              |                | puthua         |                 |      | R             | C                |      |                     | C                      | R    | 0.57 |
|              |              | subchalybea    |                |                 |      | R             | R                |      | C                   | C                      | 0.71 |      |
|              | (Erandrena)  | principalis    |                |                 |      | R             |                  |      |                     | 0.14                   | A    |      |
|              |              | astragali      |                |                 | S    | R             |                  |      | S                   | R                      | 0.57 |      |
|              |              | auricoma       |                | R               | R    | C             | R                |      | C                   |                        | 0.71 |      |
|              |              | caerulea       |                |                 |      | C             |                  |      | R                   | R                      | 0.43 |      |
|              |              | chlorura       |                |                 | R    | C             |                  | R    | C                   | C                      | 0.71 |      |
|              |              | dissimulans    |                |                 | R    | C             |                  |      | C                   | C                      | 0.57 |      |
|              |              | misella        |                |                 |      | S             |                  |      |                     |                        | 0.14 | A    |
|              |              | nigrocaerulea  |                | S               | R    | R             |                  |      | S                   | R                      | 0.71 |      |
|              |              | suavis         |                |                 |      | R             |                  |      | C                   | C                      | 0.43 |      |
|              | subdepressa  |                |                |                 | R    |               |                  | R    | S                   | 0.43                   |      |      |

|            |                   |                           |   |   |   |   |   |   |      |   |
|------------|-------------------|---------------------------|---|---|---|---|---|---|------|---|
|            | (Genyandrena)     | mackieae                  | R | C |   |   | R |   | 0.43 |   |
|            | (Hesperandrena)   | baeriae                   | S | S |   |   | R | R | 0.57 |   |
|            |                   | compositarum              |   |   |   |   | S | S | 0.29 | N |
|            |                   | escondida                 |   |   |   |   |   | R | 0.14 | N |
|            | (Holandrena)      | cressonii ssp. infasciata |   | S |   | S |   |   | 0.29 | A |
|            | (Melandrena)      | cerasifolii               | C | C | C | S | C | C | 1    |   |
|            |                   | aff. cerasifolii          |   | C | C | C | C | C | 0.71 |   |
|            |                   | perimelas                 |   |   |   | S |   |   | 0.14 | A |
|            |                   | sola                      | R | C | C | C | C | C | 0.86 |   |
|            | (Micrandrena)     | annectens                 |   |   | R |   |   |   | 0.14 | A |
|            |                   | chlorogaster              |   | R | C |   | R | C | 0.71 |   |
|            |                   | aff. ishii                |   |   | C |   |   |   | 0.14 | A |
|            |                   | microchlora               |   | R | C | S |   | R | 0.71 |   |
|            |                   | piperi                    |   | S | R |   | S | R | 0.71 |   |
|            | (Nemandrena)      | crudeni                   |   |   | C |   | S | C | 0.57 |   |
|            |                   | subnigripes               |   |   | S |   |   |   | 0.14 | A |
|            | (Oligandrena)     | macrocephala              | R | C | C |   | C | C | 0.86 |   |
|            | (Parandrena)      | concinula                 |   |   | S |   | R |   | 0.29 |   |
|            | (Pelicanandrena)  | atypica                   | S | R | C | R | R | R | 1    |   |
|            | (Plastandrena)    | prunorum                  |   |   |   |   |   | S | 0.14 | N |
|            | (Psammandrena)    | congrua                   |   | R | R |   | R | R | 0.57 |   |
|            | (Ptilandrena)     | pallidiscopa              |   |   | R |   |   | R | 0.29 |   |
|            | (Scaphandrena)    | lomatii                   |   |   | S |   |   |   | 0.14 | A |
|            |                   | plana                     |   |   | R |   |   |   | 0.14 | A |
|            |                   | santaclarae               |   | S | R |   | R | R | 0.57 |   |
|            | (Scolianandrena)  | cryptanthae               | R |   |   |   | R |   | 0.29 |   |
|            |                   | osmioides                 |   |   | R |   | R | S | 0.43 |   |
|            | (Scrapteropsis)   | biareola                  |   |   | R |   |   |   | 0.14 | A |
|            | (Simandrena)      | angustitarsata            | R | R | C | C | C | C | 0.86 |   |
|            |                   | hypoleuca                 |   |   |   |   | S | R | 0.29 | N |
|            |                   | orthocarpus               |   |   | R |   | R | R | 0.43 |   |
|            |                   | pallidifovea              | S | R | R | R | R | R | 0.86 |   |
|            | (Thysandrena)     | candida                   | C | C | C | C | R | C | 1    |   |
|            |                   | knuthiana                 |   |   |   |   | S | C | 0.43 |   |
|            |                   | vierecki                  |   | S | S |   |   |   | 0.29 | A |
|            |                   | w-scripta                 | R | R | C | C |   | S | 0.71 |   |
|            | (Trachandrena)    | fuscicauda                |   |   | S | R |   |   | 0.29 | A |
|            |                   | semipunctata              |   | R | S |   | S |   | 0.43 |   |
|            | (Tylandrena)      | subaustralis              |   |   |   |   | S |   | 0.14 | N |
|            |                   | subtilis                  |   |   | S |   |   |   | 0.14 | A |
|            |                   | waldmeri                  |   |   | R |   |   |   | 0.14 | A |
| Calliopsis | (Micronomadopsis) | fracta                    | R | S | R |   | S |   | 0.57 |   |
|            |                   | helianthi                 |   |   |   | R | S |   | 0.29 |   |
|            |                   | mellipes                  |   | S |   |   | R |   | 0.29 |   |
|            |                   | trifolii                  | R |   |   | R |   |   | 0.29 | A |
|            | (Nomadopsis)      | anthidia                  | S | R | R |   | S | S | 0.71 |   |
|            |                   | obscura                   | R | C | R | R | C | C | 1    |   |

|        |              |                    |                             |   |   |   |   |   |   |      |      |
|--------|--------------|--------------------|-----------------------------|---|---|---|---|---|---|------|------|
|        |              |                    | zonalis                     | S | S | S |   |   |   | 0.43 | A    |
|        |              |                    | smithi                      | C | C | C | C |   | S | 0.71 |      |
|        | Macrotera    | (Macroteropsis)    | arcuata                     |   |   | S |   |   | S | R    | 0.43 |
|        | Panurginus   |                    | gracilis                    |   |   | C | R | C | C | C    | 0.71 |
|        |              |                    | melanocephalus              |   | R | R |   |   | C | C    | 0.57 |
|        |              |                    | nigrellus                   | C | C | C |   | R | C | C    | 0.86 |
|        |              |                    | aff. occidentalis           |   |   |   |   | S |   |      | 0.14 |
|        | Perdita      | (Hesperoperdita)   | tresignata ssp. ornata      | R | C | C | C |   | S | S    | 0.86 |
|        |              | (Perdita)          | claypolei ssp. limatula     |   | C | C |   |   |   |      | 0.29 |
|        |              |                    | hirticeps ssp. hirticeps    |   |   |   |   | S |   | R    | 0.29 |
|        |              |                    | n. sp. aff. holoxantha      |   |   |   |   |   | S |      | 0.14 |
|        |              |                    | isocomae                    |   | S |   |   |   |   |      | 0.14 |
|        |              |                    | jucunda                     |   | R |   | S |   |   |      | 0.29 |
|        |              |                    | linsleyi                    | R | R | R | S |   | R |      | 0.71 |
|        |              |                    | rhois ssp. reducta          | C | C | C | S |   |   | R    | 0.71 |
|        |              |                    | salicis ssp. personata      |   |   |   |   |   | R |      | 0.14 |
|        |              | (Pygoperdita)      | aureovittata ssp. stenozona |   | S |   |   |   |   |      | 0.14 |
|        |              |                    | californica                 |   |   | R |   |   |   |      | 0.14 |
|        |              |                    | distropica                  | R | C | C | C | C | C | C    | 1    |
|        |              |                    | micheneri ssp. micheneri    |   |   | C | R | S | R |      | 0.57 |
|        |              |                    | montereyensis               | C | C | C | C | S | C | C    | 1    |
|        |              |                    | nitens                      | C | C | R |   |   | C | R    | 0.71 |
| Apidae | Anthophora   | (Anthophoroides)   | californica                 | R | C | R | R | S | R | R    | 1    |
|        |              | (Heliophila)       | columbariae                 |   |   | R |   |   |   |      | 0.14 |
|        |              |                    | curta                       | R | R | S | R |   | R | R    | 0.86 |
|        |              |                    | estebana                    |   | S |   |   |   |   |      | 0.14 |
|        |              |                    | flavocincta                 |   |   |   |   | S |   |      | 0.14 |
|        |              | (Lophanthophora)   | pacifica                    |   | R | C |   |   | S |      | 0.43 |
|        |              | (Melea)            | bomboides                   | S |   |   |   |   |   |      | 0.14 |
|        |              | (Mystacanthophora) | urbana                      | R | C | C | C | S | C | C    | 1    |
|        |              | (Paramegilla)      | centrifformis               | R | C | R | C |   | R |      | 0.71 |
|        |              | (Pyganthophora)    | crotchii                    | R | C | R | R | S | C | C    | 1    |
|        |              |                    | edwardsii                   | R | R | R |   |   | C | C    | 0.71 |
|        |              |                    | platti                      | C | C | C | R |   | C | C    | 0.86 |
|        | Anthophorula | (Anthophorisca)    | nitens                      |   | C | C |   |   | C | C    | 0.57 |
|        |              | (Anthophorula)     | albicans                    |   | C | C |   | R | S | C    | 0.71 |
|        | Apis         |                    | mellifera                   | R | C | C | C | C | C | C    | 1    |
|        | Bombus       | (Crotchiibombus)   | crotchii                    |   | C | C | S |   |   |      | 0.43 |
|        |              | (Fervidobombus)    | californicus                | R | C | C | R | R | R | R    | 1    |
|        |              | (Pyrobombus)       | caliginosus                 |   | C |   |   |   | S | S    | 0.43 |
|        |              |                    | melanopygus                 | R | C | C | R | R | C | R    | 1    |
|        |              |                    | vandykei                    |   | R | R |   |   | R |      | 0.43 |
|        |              |                    | vosnesenskii                | R | C | C | S | S | C | R    | 1    |
|        | Brachynomada | (Melanomada)       | melanantha                  |   |   |   |   |   |   | R    | 0.14 |
|        | Centris      | (Paracentris)      | aff. californica            |   | C | C | R |   |   |      | 0.43 |
|        | Ceratina     | (Ceratina)         | arizonensis                 | C | C | C | C | C | C | C    | 1    |
|        |              | (Euceratina)       | dallatorreana               |   |   | S |   | R |   | C    | 0.43 |

|            |                   |                       |   |   |   |   |   |   |   |      |   |
|------------|-------------------|-----------------------|---|---|---|---|---|---|---|------|---|
|            | (Zadontomerus)    | acantha               | S | C | R |   | R | C | C | 0.86 |   |
|            |                   | hurdi                 | S | R | R |   | R | C | C | 0.86 |   |
|            |                   | nanula                | R | C | C | C | C | C | C | 1    |   |
|            |                   | aff. nanula           | S | R | S |   | S | R | R | 0.86 |   |
|            |                   | pacifica              |   | R | S |   |   | S | R | 0.57 |   |
|            |                   | punctigena            | S | C | R | C |   | R | S | 0.86 |   |
|            |                   | sequoiae              | R | C | C | C | R | C | C | 1    |   |
|            |                   | tejonensis            |   | C | R |   |   | R |   | 0.43 |   |
|            |                   | timberlakei           |   | R | R | R |   | R | S | 0.71 |   |
| Diadasia   |                   | aff. ochracea         |   | S | S |   | S | R | C | 0.71 |   |
|            |                   | angusticeps           |   | R | R | C | R | C | C | 0.86 |   |
|            |                   | australis             |   |   |   |   | S | S |   | 0.29 |   |
|            |                   | bituberculata         | R | C | R | C | C | C | C | 1    |   |
|            |                   | consociata            |   |   |   |   |   |   | R | 0.14 | N |
|            |                   | laticauda             |   | C | C | R | R | C | C | 0.86 |   |
|            |                   | nigrifrons            |   |   |   |   |   | S |   | 0.14 | N |
|            |                   | nitidifrons           |   | R | C | R | R | C | C | 0.86 |   |
|            |                   | rinconis              |   |   |   |   |   |   | R | 0.14 | N |
| Epeolus    |                   | americanus            | S | R |   |   | S | R | R | 0.71 |   |
|            |                   | compactus             |   |   | R | S |   |   | S | 0.43 |   |
|            |                   | mesillae              |   |   |   |   |   | S | R | 0.29 | N |
|            |                   | minimus               |   |   |   | S | S |   | S | 0.43 |   |
| Eucera     | (Synhalonia)      | actuosa               |   | S | R | R | C | C | C | 0.86 |   |
|            |                   | amsinckiae            | R | R | R |   | R | R | R | 0.86 |   |
|            |                   | cordleyi              |   | R | C |   | S | C | R | 0.71 |   |
|            |                   | delphinii             |   | C | R | S | S | R | R | 0.86 |   |
|            |                   | dorsata               |   | C | R | R | S | C | C | 0.86 |   |
|            |                   | edwardsii             | S | R | R |   | S |   | R | 0.71 |   |
|            |                   | lunata                |   |   | R |   |   | R | R | 0.43 |   |
|            |                   | venusta ssp. carinata | C | C | C | R |   | R | R | 0.86 |   |
|            |                   | virgata               |   |   | C | S | S | C | C | 0.71 |   |
| Habropoda  |                   | dammersi              |   |   | R |   |   |   |   | 0.14 | A |
|            |                   | depressa              | S | C | C | R | S | C | C | 1    |   |
|            |                   | tristissima           | R | C | R | S | R | R | C | 1    |   |
| Melecta    | (Melecta)         | pacifica              |   | R | R |   |   | R |   | 0.43 |   |
|            |                   | separata              |   |   | S | R | R | R | C | 0.71 |   |
|            | (Melectomimus)    | edwardsii             |   | R |   |   |   | S |   | 0.29 |   |
| Melissodes | (Callimelissodes) | clarkiae              |   | R |   |   |   | R | R | 0.43 |   |
|            |                   | composita             |   |   |   |   |   |   | S | 0.14 | N |
|            |                   | lupina                |   | R | C |   | R | C | C | 0.71 |   |
|            |                   | lustra                |   | S |   |   |   |   |   | 0.14 | A |
|            |                   | n. sp. 1              |   | R |   | R |   |   |   | 0.29 | A |
|            |                   | n. sp. 2              |   | R | R | R | S | R | C | 0.86 |   |
|            |                   | nigracauda            |   |   | S |   |   |   |   | 0.14 | A |
|            |                   | plumosa               |   | R |   |   |   | R | C | 0.43 |   |
|            |                   | stearnsi              |   | R | S |   | C | C | C | 0.71 |   |
|            | (Eumelissodes)    | paulula               |   | R |   |   |   |   |   | 0.14 | A |

|               |                |                          |   |   |   |   |   |   |      |      |
|---------------|----------------|--------------------------|---|---|---|---|---|---|------|------|
|               |                | velutina                 |   |   |   |   |   | R | 0.14 | N    |
|               | (Melissodes)   | tepida                   |   |   |   |   |   | C | 0.14 | N    |
| Neopasites    | (Micropasites) | sp. 4                    |   |   |   |   |   | S | 0.14 | N    |
| Nomada        | (Centrias)     | crotchii spp. crotchii   |   | R | S |   |   |   | 0.29 | A    |
|               |                | crotchii ssp. nigrior    |   |   |   |   |   | R | R    | 0.43 |
|               |                | sp. A                    | S | R |   |   |   |   | 0.29 | A    |
|               | (Holonomada)   | edwardsii spp. edwardsii |   | R | R |   |   | S | 0.43 |      |
|               | (Nomada)       | sp. A                    | R | R | S |   |   | R | S    | 0.71 |
|               |                | sp. AA                   |   |   |   |   |   | S | 0.14 | N    |
|               |                | sp. B                    | S | S | S |   |   | R | R    | 0.71 |
|               |                | sp. BB                   |   |   |   |   | S | R | R    | 0.43 |
|               |                | sp. CC                   |   |   |   |   | S | S | 0.29 |      |
|               |                | sp. D                    | C | C | C | S |   |   | 0.57 | A    |
|               |                | sp. DD                   |   |   |   |   |   | S | 0.14 | N    |
|               |                | sp. E                    | C | R | S | R |   | R | R    | 0.86 |
|               |                | sp. EE                   |   |   |   |   |   | R | 0.14 | N    |
|               |                | sp. F                    | S |   | R |   |   | S | 0.43 |      |
|               |                | sp. FF                   |   |   |   |   |   | S | 0.14 | N    |
|               |                | sp. G                    |   |   |   |   |   | R | R    | 0.29 |
|               |                | sp. GG                   |   |   | S |   |   | R | 0.29 |      |
|               |                | sp. HH                   |   |   | S |   | S |   | 0.29 | A    |
|               |                | sp. I                    |   |   | S |   |   |   | 0.14 | A    |
|               |                | sp. II                   |   |   |   |   | R | R | 0.29 |      |
|               |                | sp. J                    |   |   | S |   |   | S | 0.29 |      |
|               |                | sp. Q                    |   | S | S |   |   | S | 0.43 |      |
|               |                | sp. R                    |   | R | R |   |   |   | 0.29 | A    |
|               |                | sp. S                    |   | S |   |   |   |   | 0.14 | A    |
|               |                | sp. T                    |   | S |   |   |   |   | 0.14 | A    |
|               |                | sp. U                    |   | C | C |   |   | R | C    | 0.57 |
|               |                | sp. V                    | S | R | R |   | R | R | R    | 0.86 |
|               |                | sp. W                    |   | C | C |   |   | C | C    | 0.57 |
|               |                | sp. X                    |   |   | S |   |   | R | R    | 0.43 |
|               |                | sp. Y                    |   |   | R |   | S |   | 0.29 | A    |
|               |                | sp. Z                    |   |   | C |   |   |   | 0.14 | A    |
| Oreopasites   |                | aff. hurdi n.sp.         |   | S | R | S |   | S | S    | 0.71 |
|               |                | vanduzeei                | R | R | S | S |   | S | 0.71 |      |
| Peponapis     | (Peponapis)    | pruinosa                 |   |   |   |   |   | R | 0.14 | N    |
| Townsendiella |                | ensifera                 |   | R | C | C |   | R | 0.57 |      |
|               |                | rufiventris              |   |   | S |   |   |   | 0.14 | A    |
| Triepeolus    |                | heterurus                |   |   |   |   |   | R | 0.14 | N    |
|               |                | melanarius               |   |   |   |   |   | S | 0.14 | N    |
|               |                | sp. P1                   |   |   |   |   |   | R | S    | 0.29 |
|               |                | sp. P2                   |   |   |   |   |   | R | 0.14 | N    |
|               |                | sp. P3                   |   |   |   |   |   | R | 0.14 | N    |
|               |                | sp. P4                   |   |   | R |   |   |   | 0.14 | A    |
|               |                | timberlakei              |   | R | R | R |   | S | R    | 0.71 |
|               |                | aff. timberlakei         |   |   |   |   | S | R | 0.29 |      |

|            |                 |                 |                                 |                          |                  |   |   |   |   |   |      |      |      |      |      |      |
|------------|-----------------|-----------------|---------------------------------|--------------------------|------------------|---|---|---|---|---|------|------|------|------|------|------|
| Colletidae | Xeromelecta     | (Melectomorpha) | californica                     | R                        | C                | R | C |   | R | R | 0.86 |      |      |      |      |      |
|            |                 | (Xeromelecta)   | larreae                         | S                        |                  |   |   |   |   |   |      | 0.14 | A    |      |      |      |
|            | Xylocopa        | (Notoxylocopa)  | tabaniformis ssp. orpifex       | R                        | C                | R | R | S | R | R | 1    |      |      |      |      |      |
|            | Colletes        | consors         |                                 | californicus             |                  |   |   |   |   |   | S    | 0.14 | N    |      |      |      |
|            |                 |                 |                                 | consors ssp. pascoensis  | C                | C | R | R |   | C | R    | 0.86 |      |      |      |      |
|            |                 |                 |                                 | daleae                   | S                | C | C | R |   | R | C    | 0.86 |      |      |      |      |
|            |                 |                 |                                 | simulans                 |                  |   | R | R | R |   |      | R    | 0.57 |      |      |      |
|            |                 |                 |                                 | simulans ssp. nevadensis |                  |   | S |   |   |   |      |      | 0.14 | A    |      |      |
|            |                 |                 |                                 | slevini                  | R                | C | C | C |   | R | R    | 0.86 |      |      |      |      |
|            |                 |                 |                                 |                          |                  |   |   | S | R |   |      |      | 0.29 | A    |      |      |
|            |                 |                 |                                 |                          |                  |   |   | S |   |   |      |      | 0.14 | A    |      |      |
|            |                 |                 |                                 |                          |                  |   |   |   | R | R |      |      | 0.43 |      |      |      |
|            |                 |                 |                                 |                          |                  |   |   |   | C | C | C    | S    | R    | R    | 0.86 |      |
|            | Halictidae      | Hylaeus         | (Cephalylaeus)                  | nunenmacheri             |                  |   |   |   |   |   |      |      |      |      |      |      |
|            |                 |                 | (Hylaeus)                       | bisinuatus               |                  |   |   |   |   |   |      |      |      |      |      |      |
|            |                 |                 |                                 | conspicuus               |                  |   |   |   | R | R |      |      |      |      |      |      |
|            |                 |                 |                                 | granulatus               |                  |   |   |   |   | C | C    | C    | S    | R    | R    | 0.86 |
|            |                 |                 |                                 | mesillae ssp. cressoni   | R                | C | C | C |   | S | C    | C    | 1    |      |      |      |
|            |                 |                 |                                 | rudbeckiae               | R                |   |   |   |   |   | R    | R    | 0.43 |      |      |      |
|            |                 |                 | verticalis                      | R                        | C                | C | C |   |   | R | R    | 0.86 |      |      |      |      |
|            |                 |                 | (Paraprosopis)                  | aff. cookii n.sp.        |                  |   | R | R | R |   |      |      | 0.43 | A    |      |      |
|            |                 |                 |                                 | calvus                   | R                |   |   | C | C |   | R    | C    | 0.71 |      |      |      |
|            |                 |                 |                                 | coloradensis             |                  |   |   | C | C | R |      |      | 0.43 | A    |      |      |
|            |                 |                 |                                 | n. sp.2                  |                  |   |   | C | R | R |      | R    | 0.57 |      |      |      |
|            |                 |                 |                                 | nevadensis               | C                | C | C | C |   |   | R    | C    | 0.86 |      |      |      |
|            |                 |                 |                                 | polifolii                |                  |   |   | C | C | C |      | R    | 0.57 |      |      |      |
|            |                 |                 |                                 | (Prosopis)               | aff. episcopalis | C | C | C | C |   | R    | R    | 0.86 |      |      |      |
|            |                 |                 |                                 | (Spatulariella)          | punctatus        |   |   |   |   | S |      |      | 0.14 | A    |      |      |
| Halictidae |                 |                 | Agapostemon                     | (Agapostemon)            | femoratus        |   |   |   |   |   | R    | R    | 0.29 |      |      |      |
|            |                 |                 |                                 |                          | texanus          | R | R | R | C | C | C    | C    | 1    |      |      |      |
|            |                 |                 | Augochlorella<br>Conanthalictus | (Augochlorella)          | pomoniella       |   |   | R | R |   |      |      | R    | 0.43 |      |      |
|            |                 |                 |                                 | (Phaceliapis)            | bakeri           |   |   | S | R | S |      | R    | S    | 0.71 |      |      |
|            | Dufourea        |                 |                                 | seminiger                |                  |   |   |   | S |   | S    | 0.29 |      |      |      |      |
|            |                 |                 |                                 | dentipes                 |                  |   |   |   |   |   | S    |      | 0.14 | N    |      |      |
|            |                 |                 |                                 | leachi                   | S                | S | C | R | R | R | C    | 1    |      |      |      |      |
|            |                 |                 |                                 | mulleri                  |                  |   | R | R |   |   | R    |      | 0.43 |      |      |      |
|            |                 |                 |                                 | rhamni                   | R                | R | R |   |   |   |      | S    | 0.57 |      |      |      |
|            |                 |                 |                                 | sandhouseae              |                  |   | C | C |   |   | C    | C    | 0.57 |      |      |      |
|            |                 |                 |                                 | sparsipunctata           | C                | C | R | R | C | C | C    | 1    |      |      |      |      |
|            |                 |                 |                                 | virgata                  | C                | R | S | S |   | R | R    | 0.86 |      |      |      |      |
|            |                 |                 | Halictus                        | (Nealictus)              | farinosus        | C | C | C | C | C | C    | C    | C    | 1    |      |      |
|            |                 |                 |                                 | (Odontalictus)           | ligatus          |   |   |   |   | R | C    | C    | C    | 0.57 |      |      |
|            | (Protohalictus) | rubicundus      |                                 |                          |                  |   |   |   | S |   |      | 0.14 | A    |      |      |      |
|            | (Seladonia)     | tripartitus     |                                 | C                        | C                | C | C | C | C | C | 1    |      |      |      |      |      |
|            | Lasioglossum    | (Dialictus)     |                                 | albohirtum               |                  |   |   |   | R | S | R    | 0.43 |      |      |      |      |
|            |                 |                 |                                 | brunneiventre            |                  |   | R | R | R | C | C    | 0.71 |      |      |      |      |
|            |                 |                 |                                 | diversopunctatum         |                  |   |   |   | S |   | R    |      | 0.29 |      |      |      |
|            |                 |                 | hudsoniellum                    |                          |                  |   |   |   | S | R | 0.29 | N    |      |      |      |      |
|            |                 |                 | imbrex                          | R                        | C                | C | C |   | C | C | 0.86 |      |      |      |      |      |
|            |                 |                 | cf. impavidum                   |                          |                  |   |   |   |   | S |      | 0.14 | N    |      |      |      |
|            |                 |                 | incompletum                     | R                        | R                | C | C |   | C | C | 0.86 |      |      |      |      |      |

|  |  |                           |                               |   |   |   |   |   |   |   |      |      |
|--|--|---------------------------|-------------------------------|---|---|---|---|---|---|---|------|------|
|  |  |                           | megastictum                   |   |   | S |   |   | R |   | 0.29 |      |
|  |  |                           | nevadense                     | R | C | C | C |   | C | C | 0.86 |      |
|  |  |                           | perichlarum                   |   |   |   |   |   | R |   | 0.14 | N    |
|  |  |                           | petrellum                     |   |   | S |   |   |   |   | 0.14 | A    |
|  |  |                           | punctatoventre                | R | C | C | C |   | C | C | 0.86 |      |
|  |  |                           | aff. ruidosense               | R | R |   | R |   |   |   | 0.43 | A    |
|  |  | (Evylaeus)                | argemonis                     | R | C | C | C |   | C | C | 0.86 |      |
|  |  |                           | giffardi                      |   |   |   |   | S | C | R | 0.43 |      |
|  |  |                           | robustum                      |   |   | S | R | C | C | C | 0.71 |      |
|  |  | (Hemihalictus)            | aspilurum                     |   |   | S |   | S | R | R | 0.57 |      |
|  |  |                           | glabriventre                  | R | R | R | C |   | C | C | 0.86 |      |
|  |  |                           | kincaidii                     | R | R | S | S |   | R | R | 0.86 |      |
|  |  |                           | ovaliceps                     |   |   | S | R |   | S |   | 0.43 |      |
|  |  |                           | ruficorne                     | R | R | C | C |   | C | R | 0.86 |      |
|  |  |                           | sequoiae                      | S |   | R | C |   | C | C | 0.71 |      |
|  |  | (Lasioglossum)            | egregium                      |   |   | S | R | R | C | C | 0.71 |      |
|  |  |                           | mellipes                      |   |   |   |   |   | R | C | R    | 0.43 |
|  |  |                           | sisymbrii                     | R | C | C | C | C | C | C | 1    |      |
|  |  |                           | titusi                        |   |   | S | R |   | C | C | 0.57 |      |
|  |  | (Sphecodogastra)          | allonotum                     |   |   | S |   |   | R | R | 0.43 |      |
|  |  |                           | aff. avalonense               |   |   | S | R | C | C | C | 0.71 |      |
|  |  |                           | miguelense                    |   |   | S |   | R | R | C | 0.57 |      |
|  |  |                           | nigrescens                    | C | C | C | C |   | C | C | 0.86 |      |
|  |  |                           | sp. 16                        |   |   |   |   | R | C | C | 0.43 |      |
|  |  | Micalictoides             | altadenae                     |   |   | S |   |   | R |   | 0.29 |      |
|  |  |                           | ruficaudus                    | R | R | S |   |   | C | R | 0.71 |      |
|  |  | Sphecodes                 | arvensiformis                 | S | R |   |   | S | S | R | 0.71 |      |
|  |  |                           | sp. B                         | R | C | C | R |   | R | R | 0.86 |      |
|  |  |                           | sp. C                         | R |   |   |   |   |   |   | 0.14 | A    |
|  |  |                           | sp. D                         | R |   | S | R |   | R | R | 0.71 |      |
|  |  |                           | sp. E                         | S | R | R | C | R | C | C | 1    |      |
|  |  |                           | sp. F                         | S | R |   |   |   |   |   | 0.29 | A    |
|  |  |                           | sp. I                         |   |   | S |   |   |   |   | 0.14 | A    |
|  |  |                           | sp. J                         |   |   | R |   |   |   |   | 0.14 | A    |
|  |  |                           | sp. K                         |   |   | S |   |   |   |   | 0.14 | A    |
|  |  |                           | sp. L                         |   |   | S | R | C | R |   | 0.57 |      |
|  |  |                           | sp. M                         |   |   |   |   |   |   | S | 0.14 | N    |
|  |  | Megachilidae              | Anthidiellum (Loyalanthidium) |   |   | C | C |   | R |   | 0.43 |      |
|  |  |                           | Anthidium (Anthidium)         | R | C | C | C | R | R | R | 1    |      |
|  |  |                           | edwardsii                     |   |   |   |   |   | R |   | 0.14 | N    |
|  |  |                           | jocosum                       |   |   |   |   |   | R |   | 0.14 | N    |
|  |  |                           | maculosum                     |   |   | S |   |   |   |   | 0.14 | A    |
|  |  |                           | mormonum                      | S | R | S | R |   |   |   | 0.57 | A    |
|  |  |                           | pallidiclypeum                | R | S | R | S | S |   |   | 0.71 | A    |
|  |  |                           | utahense                      | C | C | C | C | C | C | C | 1    |      |
|  |  | (Callanthidium)           | illustre                      |   |   | C | R | R | S | R | 0.71 |      |
|  |  | Ashmeadiella (Arogochila) | aff. salviae n. sp. 2         |   |   |   |   |   | S |   | 0.14 | N    |



|             |                  |                              |  |   |   |   |   |   |   |      |      |   |
|-------------|------------------|------------------------------|--|---|---|---|---|---|---|------|------|---|
|             |                  | australis                    |  | R | R | R |   |   | S | 0.57 |      |   |
|             |                  | salviae                      |  | R | C | C | R | S | R | C    | 1    |   |
|             |                  | timberlakei                  |  | C | C | C | C |   | R | R    | 0.86 |   |
|             | (Ashmeadiella)   | altadenae                    |  |   |   |   |   |   |   | R    | 0.29 | N |
|             |                  | aridula                      |  |   |   |   |   |   | R | C    | 0.29 |   |
|             |                  | bucconis                     |  |   | C | R |   |   |   | R    | 0.43 |   |
|             |                  | cactorum ssp. basalis        |  |   | R |   |   |   |   | R    | 0.29 |   |
|             |                  | californica ssp. californica |  | R | C | C | C | R | R | C    | 1    |   |
|             |                  | difugita ssp. emarginatula   |  |   | R | R |   |   | S | R    | 0.57 |   |
|             |                  | femorata                     |  |   | R |   | C |   |   |      | 0.29 | A |
|             |                  | foveata                      |  | S | C | C | C |   | S |      | 0.71 |   |
|             |                  | gillettei ssp. cismontanica  |  |   | S | S |   |   |   |      | 0.29 | A |
|             |                  | meliloti                     |  |   | C | C |   |   |   |      | 0.29 | A |
|             |                  | pronitens                    |  |   | S |   |   |   |   |      | 0.14 | A |
|             |                  | aff. rufitarsis              |  | R | R | R | R |   |   |      | 0.57 | A |
|             |                  | sonora                       |  |   | R | S |   | S |   | R    | 0.57 |   |
|             |                  | titusi                       |  |   | C | R | S |   |   | S    | 0.57 |   |
| Atoposmia   | (Atoposmia)      | n. sp. 2                     |  | R | R | S |   |   | S |      | 0.57 |   |
|             |                  | pycnognatha                  |  |   | C | R | S |   |   |      | 0.43 | A |
|             | (Eremosmia)      | hemizoniae                   |  |   |   |   |   |   | S |      | 0.14 | N |
|             | (Hexosmia)       | copelandica ssp. copelandica |  | R | C | R | R | S | R | R    | 1    |   |
| Chelostoma  | (Chelostoma)     | aff. minutum n.sp.           |  |   | R | R | R |   |   | S    | 0.57 |   |
|             |                  | californicum                 |  | C | C | C | C | S | C | R    | 1    |   |
|             |                  | cockerelli                   |  | C | C | C | C | R | C | C    | 1    |   |
|             |                  | incisulum                    |  | C | C | C | C |   | C | R    | 0.86 |   |
|             |                  | marginatum ssp. incisuloides |  | C | C | C | R |   | C | R    | 0.86 |   |
|             |                  | phaceliae                    |  | C | C | C | C |   | C | R    | 0.86 |   |
|             |                  | tetramerum                   |  | R | C | C | R |   | S | R    | 0.86 |   |
| Coelioxys   | (Boreocoelioxys) | octodentata                  |  |   | R | R | S |   | S |      | 0.57 |   |
|             | (Coelioxys)      | hirsutissima                 |  |   |   |   |   |   | R |      | 0.14 | N |
|             |                  | serricaudata                 |  | S | R | R | R | S | R | R    | 1    |   |
|             | (Cyrtocoelioxys) | gilensis                     |  |   | S |   |   |   |   |      | 0.14 | A |
|             |                  | gonaspis                     |  |   | R |   |   |   |   |      | 0.14 | A |
| Dianthidium | (Dianthidium)    | dubium ssp. dilectum         |  |   | C | C | R | R | R | C    | 0.86 |   |
|             |                  | parvum ssp. schwarzi         |  |   |   |   |   | R | R | R    | 0.43 |   |
|             |                  | pudicum ssp. consimile       |  | S | S | S | R | R | R | C    | 1    |   |
|             |                  | singulare                    |  |   | S |   |   |   |   |      | 0.14 | A |
|             |                  | ulkei ssp. ulkei             |  |   | R | S |   | S |   | R    | 0.57 |   |
| Dioxys      |                  | aurifusca                    |  |   | S |   |   |   |   |      | 0.14 | A |
|             |                  | pacifica ssp. pacifica       |  |   |   | S |   | S |   | R    | 0.43 |   |
|             |                  | pomona ssp. pomona           |  | R | R | R | R |   | C | R    | 0.86 |   |
|             |                  | producta ssp. cismontanica   |  | R | R | R | R |   | R | S    | 0.86 |   |
| Heriades    | (Neotrypetes)    | occidentalis                 |  |   | C | C |   |   |   |      | 0.29 | A |
| Hoplitis    | (Acrosmia)       | aff. emarginata              |  |   | C | R | R |   | S |      | 0.57 |   |
|             | (Alcidamea)      | colei                        |  | R | C | R | C | R | C | C    | 1    |   |
|             |                  | grinnelli                    |  | R | C | R | R |   |   | R    | 0.71 |   |
|             |                  | producta ssp. bernardina     |  |   | C |   |   |   | C | S    | 0.43 |   |

|           |                   |                              |   |   |   |   |   |   |   |      |   |
|-----------|-------------------|------------------------------|---|---|---|---|---|---|---|------|---|
|           |                   | producta ssp. gracilis       | C | C | C | C | R | C | R | 1    |   |
|           |                   | sambuci                      | S | C | R | S |   |   | S | 0.71 |   |
|           | (Cyrtosmia)       | hypocrita                    | S | C | C | R |   | R | R | 0.86 |   |
|           | (Hoplitina)       | bunocephala                  | S |   | S |   |   |   |   | 0.29 | A |
|           |                   | howardi                      | C | C | C | C |   | R | R | 0.86 |   |
|           | (Monumetha)       | albifrons ssp. maura         | C | C | C | C | C | C | C | 1    |   |
|           |                   | fulgida ssp. platyura        | C | C | C | C | R | C | R | 1    |   |
|           | (Penteriades)     | remotula                     | R | C | R |   | S | R | S | 0.86 |   |
|           | (Proteriades)     | cryptanthae                  | R | R |   |   | S |   |   | 0.43 | A |
|           |                   | jacintana                    | C | C | S | R |   | R |   | 0.71 |   |
|           |                   | nanula                       | R | C | S | R |   | R |   | 0.71 |   |
|           |                   | seminigra                    | S | C | R | S |   | S |   | 0.71 |   |
|           |                   | semirubra                    | R | R | R | S | R | R | R | 1    |   |
| Megachile | (Argyropile)      | parallela                    |   | S |   |   |   |   |   | 0.14 | A |
|           | (Chelostomoides)  | angelarum                    |   | C | C |   |   | R | R | 0.57 |   |
|           |                   | davidsoni                    |   | C |   |   |   | S | S | 0.43 |   |
|           |                   | exilis                       |   |   |   |   |   | R |   | 0.14 | N |
|           |                   | spinotulata                  |   | C | R |   |   |   |   | 0.29 | A |
|           | (Eutricharaea)    | apicalis                     |   | C | R |   | R | S | C | 0.71 |   |
|           | (Litomegachile)   | coquilletti                  | S | C | C | S | R | C | C | 1    |   |
|           |                   | gentilis                     |   | R | S |   |   |   | R | 0.43 |   |
|           |                   | lippiae                      |   |   |   |   |   |   | R | 0.14 | N |
|           |                   | onobrychidis                 |   |   | R | S | R | R | C | 0.71 |   |
|           |                   | texana                       | S | R | R | R |   |   |   | 0.57 | A |
|           | (Megachile)       | montivaga                    |   | R |   |   | S | S | R | 0.57 |   |
|           | (Megachiloides)   | gravita                      |   | R |   | C | R | C | C | 0.71 |   |
|           |                   | pascoensis                   | R | C | R | C | R | C | C | 1    |   |
|           |                   | pseudonigra                  | S | R |   |   |   | R |   | 0.43 |   |
|           |                   | subnigra ssp. angelica       |   |   | R |   | R | C | R | 0.57 |   |
|           | (Sayapis)         | fidelis                      |   | S | R |   |   |   | S | 0.43 |   |
|           |                   | frugalis ssp. pseudofrugalis |   | C | C |   |   | S | C | 0.57 |   |
|           |                   | inimica ssp. jacumbensis     |   | R |   |   |   |   |   | 0.14 | A |
|           |                   | newberryae                   |   | R | R |   |   |   |   | 0.29 | A |
| Osmia     | (Acanthosmioides) | nigrifrons                   |   | S |   | R |   |   |   | 0.29 | A |
|           |                   | nigrobarbata                 | R | S | S | S | S | R | S | 1    |   |
|           |                   | odontogaster                 | R | C | C | R | S | R | C | 1    |   |
|           |                   | sedula                       | S | C | R | R | C | R | S | 1    |   |
|           | (Cephalosmia)     | californica                  | R | R | S | S |   | R | R | 0.86 |   |
|           |                   | montana ssp. quadriceps      | R | R | R | C | S | C | R | 1    |   |
|           | (Euthosmia)       | glauca                       | R | C | C | C | C | C | C | 1    |   |
|           | (Helicosmia)      | coloradensis                 |   | C | C | R |   | R | R | 0.71 |   |
|           |                   | texana                       |   | C | S | R | R | R | R | 0.86 |   |
|           | (Melanosmia)      | aglaia                       | R | C | C | C | C | C | C | 1    |   |
|           |                   | atrocyanea                   | R | C | C | C | C | C | C | 1    |   |
|           |                   | brevis                       | C | C | C | C | R | C | C | 1    |   |
|           |                   | calla                        | R | C | C | C | R | C | C | 1    |   |
|           |                   | cara                         | C | C | C | C | S | C | C | 1    |   |

|            |            |                                 |   |   |   |   |   |   |   |      |   |
|------------|------------|---------------------------------|---|---|---|---|---|---|---|------|---|
|            |            | clarescens                      | R | C | C | R |   | R | R | 0.86 |   |
|            |            | cyanella                        | C | C | C | C | R | C | C | 1    |   |
|            |            | cyanopoda                       | S | C | R | R |   |   | S | 0.71 |   |
|            |            | densa                           | C | C | C | R | R | C | C | 1    |   |
|            |            | gabrielis                       | C | C | C | C | R | C | C | 1    |   |
|            |            | gaudiosa                        |   |   |   |   | R | C | R | 0.43 |   |
|            |            | granulosa                       | R | C | C | C | R | C | C | 1    |   |
|            |            | aff. hesperos                   |   |   |   |   |   | S |   | 0.14 | N |
|            |            | inurbana                        |   |   | R | R | C | C | C | 0.71 |   |
|            |            | kincaidii                       | C | C | C | C | R | C | C | 1    |   |
|            |            | laeta                           | R | C | C | R | R | C | C | 1    |   |
|            |            | malina                          |   |   | S |   |   |   |   | 0.14 | A |
|            |            | melanopleura                    | C | C | C | C | R | C | R | 1    |   |
|            |            | pusilla                         | R | C |   | R | R | R | R | 0.86 |   |
|            |            | aff. pusilla                    |   |   |   |   |   | S |   | 0.14 | N |
|            |            | raritatis                       | R | R | R | R |   | R | R | 0.86 |   |
|            |            | regulina                        | R | C | C | C | C | C | C | 1    |   |
|            |            | rostrata                        |   |   |   | R |   |   |   | 0.14 | A |
|            |            | sp. P1                          |   |   |   |   | R |   | R | 0.29 |   |
|            |            | tristella                       |   |   | R | S | R |   |   | 0.43 | A |
|            |            | vandykei                        |   |   | R | R | R |   |   | 0.43 | A |
|            |            | visenda                         | C | C | C | R | R | C | C | 1    |   |
|            |            | (Mystacosmia) nemoris           |   |   | R | C | C | C | C | 0.86 |   |
|            |            | (Osmia) lignaria ssp. propinqua | R | C | C | S | R | C | C | 1    |   |
|            |            | ribifloris ssp. biedermannii    |   |   | S | S |   |   |   | 0.29 | A |
|            |            | (Pyrosmia) nigricollis          |   |   |   |   |   |   | S | 0.14 | N |
|            |            | (Trichinosmia) latisulcata      |   |   | R | S | R | C | S | 0.71 |   |
|            | Protosmia  | (Chelostomopsis) rubifloris     | C | C | C | C | R | C | C | 1    |   |
|            | Stelis     | (Protostelis) anthidioides      | S |   | R |   | S | S |   | 0.57 |   |
|            |            | hurdi                           |   |   | R | R | R | R |   | 0.71 |   |
|            |            | (Stelis) aff. foederalis n.sp.  |   |   | S |   | R |   | R | 0.43 |   |
|            |            | ashmeadiellae                   |   |   | R | R | R | S | S | 0.71 |   |
|            |            | calliphorina                    |   |   | R |   |   |   |   | 0.14 | A |
|            |            | chemsaki                        |   |   |   |   |   |   | R | 0.14 | N |
|            |            | cockerelli                      |   |   |   |   | R |   | R | 0.43 |   |
|            |            | interrupta                      |   |   |   |   | S |   | S | 0.29 |   |
|            |            | lateralis                       |   |   | R | R | R |   | R | 0.57 |   |
|            |            | micheneri                       | S | R |   |   | S |   | R | 0.57 |   |
|            |            | montana                         | R | R | R | R | S | R | R | 1    |   |
|            |            | nigriventris                    |   |   | R | R |   |   |   | 0.29 | A |
|            |            | occidentalis                    | S | R |   |   |   |   | S | 0.43 |   |
|            |            | submarginata                    | R | R | R | R |   | S |   | 0.71 |   |
|            | Trachusa   | (Heteranthidium) timberlakei    |   |   | R | C | C | R | R | 0.86 |   |
|            |            | (Trachusomimus) perdita         |   |   | C | C | C | C | C | 0.86 |   |
| Melittidae | Hesperapis | (Amblyapis) ilicifoliae         | C | C | C | C | C | C | C | 1    |   |
|            |            | (Panurgomia) regularis          | C | C | C | C | C | C | C | 1    |   |

811 **S3 Table. Floral taxa visited by bees at Pinnacles National Park (unique groups, identified**  
 812 **to lowest possible level), and their relative popularity by year.** Plants are marked with “R” for  
 813 rare if bee visits were fewer than 10 in that year, with “U” for uncommon if bee visits ranged  
 814 between 10-100, and “C” for common when over 100 bees were collected on that plant. The last  
 815 row sums the plant taxa on which bees were collected per year. Dashed vertical line marks 2002  
 816 collection as separate from original 1996-9 study, and prior to the current study.

| Plant Name                                | Early Inventory |      |      |      | Bowls<br>2002 | Recent Inventory |      |
|-------------------------------------------|-----------------|------|------|------|---------------|------------------|------|
|                                           | 1996            | 1997 | 1998 | 1999 |               | 2011             | 2012 |
| Alliaceae Allium fimbriatum               |                 |      |      |      |               | R                |      |
| Alliaceae Allium lacunosum                |                 | U    | U    | R    |               |                  |      |
| Alliaceae Allium lacunosum var.micranthum |                 |      |      |      |               |                  | R    |
| Alliaceae Allium sp.                      | U               | U    | R    |      |               |                  |      |
| Anacardiaceae Toxicodendron diversilobum  |                 |      |      |      |               | R                |      |
| Apiaceae Anthriscus caucalis              |                 |      |      |      |               | R                |      |
| Apiaceae Apiaceae sp.                     |                 | R    | U    |      |               |                  |      |
| Apiaceae Apiaceae sp. (yellow)            |                 |      | R    |      |               | R                |      |
| Apiaceae Lomatium dasycarpum              |                 |      |      |      |               |                  | R    |
| Apiaceae Lomatium sp.                     |                 | U    | R    |      |               |                  | R    |
| Apiaceae Lomatium utriculatum             |                 |      | R    |      |               | U                | R    |
| Apiaceae Perideridia californica          |                 |      | R    |      |               |                  |      |
| Apiaceae Sanicula crassicaulis            |                 |      |      |      |               | R                |      |
| Apiaceae Sanicula sp.                     |                 | R    |      |      |               |                  |      |
| Apiaceae Sanicula tuberosa                |                 |      |      |      |               | R                | R    |
| Asclepiadaceae Asclepias sp.              |                 |      | U    |      |               |                  |      |
| Asteraceae Achillea millefolium           |                 | R    |      |      |               | R                | R    |
| Asteraceae Agoseris grandiflora           |                 |      |      |      |               | R                |      |
| Asteraceae Agoseris sp.                   |                 | R    |      |      |               |                  |      |
| Asteraceae Anaphalis margaritacea         |                 | R    |      |      |               |                  |      |
| Asteraceae Asteraceae sp.                 |                 | R    | U    |      |               |                  |      |
| Asteraceae Asteraceae sp. (yellow)        |                 |      | R    |      |               |                  |      |
| Asteraceae Baccharis pilularis            |                 | U    | U    |      |               |                  |      |
| Asteraceae Baccharis salicifolia          | U               | R    |      | U    |               | U                | U    |
| Asteraceae Carduus tenuiflorus            |                 | U    |      |      |               |                  |      |
| Asteraceae Centaurea melitensis           |                 |      |      |      |               | R                | R    |
| Asteraceae Centaurea solstitialis         |                 | U    | U    |      | R             |                  | R    |
| Asteraceae Chaenactis glabriuscula        |                 | R    |      |      |               | C                | U    |
| Asteraceae Cirsium occidentale            |                 | R    | U    | R    |               | R                | R    |
| Asteraceae Cirsium sp.                    |                 | U    | R    |      |               |                  |      |
| Asteraceae Cirsium vulgare                |                 | R    | R    |      |               |                  |      |

|                                                   |   |   |   |   |   |   |   |  |
|---------------------------------------------------|---|---|---|---|---|---|---|--|
| Asteraceae Erigeron foliosus                      | U |   |   |   |   |   |   |  |
| Asteraceae Erigeron foliosus var.foliosus         |   |   |   |   |   |   | R |  |
| Asteraceae Erigeron petrophilus                   | U |   |   |   |   |   |   |  |
| Asteraceae Eriophyllum confertiflorum             | U | U | U |   |   | R | R |  |
| Asteraceae Eriophyllum lanatum                    |   | R |   |   |   |   |   |  |
| Asteraceae Eriophyllum multicaule                 |   |   |   |   |   |   | R |  |
| Asteraceae Eriophyllum sp.                        | U |   |   |   |   |   |   |  |
| Asteraceae Euthamia occidentalis                  | R |   |   |   |   |   |   |  |
| Asteraceae Gnaphalium bicolor                     |   |   |   |   |   | R |   |  |
| Asteraceae Gnaphalium californicum                |   |   |   |   |   | R | R |  |
| Asteraceae Hemizonia lobbii                       | U |   |   |   |   |   |   |  |
| Asteraceae Heterotheca sessiliflora               | U |   |   |   |   |   |   |  |
| Asteraceae Hypochaeris glabra                     |   |   |   |   |   | R |   |  |
| Asteraceae Hypochaeris radicata                   |   |   |   |   |   | U | R |  |
| Asteraceae Lasthenia californica                  | R | U | C |   |   | U | U |  |
| Asteraceae Layia hieracioides                     | R |   |   |   |   |   |   |  |
| Asteraceae Lessingia tenuis                       |   |   |   | U |   |   |   |  |
| Asteraceae Madia sp.                              | R |   |   |   |   |   |   |  |
| Asteraceae Malacothrix californica                |   |   |   |   |   | R |   |  |
| Asteraceae Microseris douglasii                   |   |   |   |   |   | R |   |  |
| Asteraceae Packeria breweri                       |   |   |   |   |   | R |   |  |
| Asteraceae Pectis papposa                         | R |   |   |   |   |   |   |  |
| Asteraceae Senecio flaccidus                      | R |   |   |   |   |   |   |  |
| Asteraceae Senecio sp.                            | U |   |   |   |   |   |   |  |
| Asteraceae Stephanomeria virgata ssp.pleurocarpa  |   |   | R |   |   |   |   |  |
| Asteraceae Wyethia helenioides                    | R |   |   |   |   | U | U |  |
| Asteraceae Wyethia sp.                            |   |   |   | R |   |   |   |  |
| Boraginaceae Amsinckia menziesii                  | U |   |   | R | R | U | U |  |
| Boraginaceae Amsinckia menziesii var.menziesii    |   | U | U | R |   | R |   |  |
| Boraginaceae Amsinckia sp.                        |   |   |   |   | U |   |   |  |
| Boraginaceae Cryptantha sp.                       | U | C | U | R |   |   | R |  |
| Boraginaceae Emmenanthe penduliflora              |   |   | R | U |   |   |   |  |
| Boraginaceae Eriodictyon sp.                      |   |   | R |   |   |   |   |  |
| Boraginaceae Eriodictyon tomentosum               | U | C | U | C |   | U | U |  |
| Boraginaceae Heliotropium curassavicum            |   | U |   |   |   | U | U |  |
| Boraginaceae Nemophila menziesii var.integrifolia |   | U | U |   |   |   |   |  |
| Boraginaceae Nemophila menziesii var.menziesii    |   |   |   |   |   | R | R |  |
| Boraginaceae Phacelia brachyloba                  | U |   |   |   |   |   |   |  |
| Boraginaceae Phacelia californica                 | U |   |   |   |   |   |   |  |
| Boraginaceae Phacelia distans                     | U | U |   |   |   |   | R |  |
| Boraginaceae Phacelia imbricata                   | U | U | U |   |   | R |   |  |
| Boraginaceae Phacelia malvifolia                  |   |   | R | U |   |   |   |  |
| Boraginaceae Phacelia ramosissima                 |   | U | U | R |   |   |   |  |
| Boraginaceae Phacelia ramosissima var.ramosissima |   |   |   |   |   | R |   |  |
| Boraginaceae Phacelia sp.                         | U | C | U | U |   |   | R |  |
| Boraginaceae Phacelia sp. (white)                 | U |   |   |   |   |   |   |  |
| Boraginaceae Pholistoma auritum                   | U | C | C | R |   |   | R |  |
| Boraginaceae Pholistoma auritum var.auritum       |   |   |   |   |   | U | R |  |
| Boraginaceae Pholistoma membranaceum              |   |   | U |   |   | R | R |  |
| Boraginaceae Plagiobothrys canescens              |   |   |   |   |   | U |   |  |
| Boraginaceae Plagiobothrys nothofulvus            |   |   | C |   |   |   |   |  |
| Boraginaceae Plagiobothrys sp.                    | R | U |   |   | U |   | R |  |
| Brassicaceae Brassica nigra                       | C | U | U |   |   |   |   |  |
| Brassicaceae Brassicaceae sp.                     |   |   |   |   | R |   |   |  |
| Brassicaceae Cardamine californica                |   | U |   |   |   |   |   |  |

|                                                    |   |   |   |   |   |   |  |   |   |   |
|----------------------------------------------------|---|---|---|---|---|---|--|---|---|---|
| Brassicaceae Cardamine californica var.californica |   |   |   | U |   |   |  |   | R |   |
| Brassicaceae Erysimum capitatum var.capitatum      |   |   |   |   |   |   |  |   | R |   |
| Brassicaceae Erysimum sp.                          |   | R |   |   |   |   |  |   |   | C |
| Brassicaceae Hirschfeldia incana                   |   |   |   |   |   |   |  |   |   | C |
| Brassicaceae Rorippa nasturtium-aquaticum          |   | U |   |   |   | R |  |   |   |   |
| Brassicaceae Thysanocarpus curvipes                |   |   |   | C |   |   |  |   |   |   |
| Brassicaceae Thysanocarpus laciniatus              |   |   |   |   |   |   |  |   |   | R |
| Caprifoliaceae Lonicera hispidula                  |   |   |   | U |   |   |  |   |   |   |
| Caprifoliaceae Lonicera sp.                        |   |   |   | U |   |   |  |   |   | R |
| Caprifoliaceae Lonicera subspicata var.denudata    |   |   |   |   |   |   |  |   | R |   |
| Caprifoliaceae Sambucus mexicana                   |   |   |   |   |   |   |  |   | R | U |
| Chenopodiaceae Chenopodium californicum            |   |   |   |   |   |   |  |   | R |   |
| Convolvulaceae Calystegia collina                  |   |   |   |   |   |   |  |   | R | U |
| Convolvulaceae Calystegia collina ssp.venusta      |   |   |   |   |   |   |  |   | R |   |
| Convolvulaceae Calystegia purpurata                |   |   |   |   |   |   |  |   |   | R |
| Convolvulaceae Calystegia sp.                      |   |   |   |   |   | R |  |   |   |   |
| Convolvulaceae Calystegia subacaulis               | R | U |   |   |   |   |  |   |   |   |
| Convolvulaceae Convolvulus arvensis                |   |   |   |   |   |   |  |   | R |   |
| Crassulaceae Dudleya cymosa                        |   | R | R | R |   |   |  |   |   |   |
| Crassulaceae Dudleya sp.                           |   | R |   |   |   |   |  |   |   |   |
| Crassulaceae Sedum spathulifolium                  |   | R |   |   |   |   |  |   |   |   |
| Cuscutaceae Cuscuta californica                    |   | R |   |   |   |   |  |   |   |   |
| Ericaceae Arctostaphylos pungens                   |   |   |   |   |   | C |  |   |   | U |
| Ericaceae Arctostaphylos sp.                       |   |   |   |   |   | R |  | U |   |   |
| Euphorbiaceae Euphorbia sp.                        |   |   |   |   |   | R |  |   |   |   |
| Fabaceae Glycyrrhiza lepidota                      |   | R |   |   |   |   |  |   |   |   |
| Fabaceae Lotus humistratus/wragelianus             |   |   |   |   |   |   |  |   | R |   |
| Fabaceae Lotus micranthus                          |   |   |   |   |   |   |  |   | R |   |
| Fabaceae Lotus purshianus                          |   |   |   | U |   |   |  |   | R |   |
| Fabaceae Lotus scoparius                           | U | C | C |   |   |   |  |   |   |   |
| Fabaceae Lotus scoparius var.scoparius             |   |   |   |   |   |   |  |   | C | U |
| Fabaceae Lotus sp.                                 |   |   |   | U | U | R |  |   |   |   |
| Fabaceae Lotus wrangelianus                        |   |   |   |   |   | U |  |   |   |   |
| Fabaceae Lupinus albifrons                         | R | U | U |   |   |   |  |   | R | U |
| Fabaceae Lupinus albifrons var.albifrons           |   |   |   |   |   |   |  |   | U | U |
| Fabaceae Lupinus bicolor                           |   | R |   |   |   |   |  |   |   |   |
| Fabaceae Lupinus concinnus                         |   |   |   |   |   |   |  |   | R |   |
| Fabaceae Lupinus microcarpus var.densiflorus       |   |   |   |   |   |   |  |   | R |   |
| Fabaceae Lupinus sp.                               | R | R | R |   |   |   |  |   |   |   |
| Fabaceae Melilotus indicus                         |   | R |   |   |   |   |  |   | U | R |
| Fabaceae Trifolium albobpurpureum                  |   |   |   |   |   |   |  |   | R |   |
| Fabaceae Trifolium depauperatum                    |   |   |   |   |   |   |  |   | R |   |
| Fabaceae Trifolium gracilentum var.gracilentum     |   |   |   |   |   |   |  |   | R |   |
| Fabaceae Trifolium microcephalum                   |   |   |   | R |   |   |  |   |   | R |
| Fabaceae Trifolium sp.                             | U | U | R |   |   |   |  |   |   |   |
| Fabaceae Trifolium willdenovii                     |   |   |   |   |   | U |  |   | R | R |
| Fabaceae Vicia sp.                                 |   |   |   |   |   | R |  |   |   |   |
| Fabaceae Vicia villosa                             |   | U | R |   |   |   |  |   | U | U |
| Fagaceae Quercus agrifolia                         |   |   |   |   |   |   |  |   | R | R |
| Fagaceae Quercus agrifolia var.agrifolia           |   |   |   |   |   |   |  |   | U | U |
| Fagaceae Quercus douglasii                         |   |   |   |   |   |   |  |   | R | R |
| Fagaceae Quercus lobata                            |   |   |   |   |   |   |  |   | R |   |
| Fagaceae Quercus sp.                               | U | R | R |   |   |   |  |   | R | R |
| Fumariaceae Dicentra chrysantha                    |   | U | R | U |   |   |  |   |   | R |
| Fumariaceae Dicentra sp.                           |   |   |   | U |   |   |  |   |   |   |

|                                       |   |   |   |   |  |   |   |   |
|---------------------------------------|---|---|---|---|--|---|---|---|
| Geraniaceae Erodium botrys            |   |   |   |   |  |   | R | R |
| Geraniaceae Erodium brachycarpum      |   |   |   |   |  |   | U | U |
| Geraniaceae Erodium cicutarium        |   |   | R |   |  |   | U | U |
| Geraniaceae Erodium sp.               |   | R |   |   |  |   |   |   |
| Hippocastanaceae Aesculus californica |   | R | R |   |  |   | R |   |
| Lamiaceae Lamium amplexicaule         |   |   |   |   |  |   |   | R |
| Lamiaceae Lepechinia calycina         |   | U | U | R |  |   | R | U |
| Lamiaceae Marrubium vulgare           |   |   |   |   |  |   | U | U |
| Lamiaceae Mentha spicata              |   | U |   |   |  |   |   |   |
| Lamiaceae Mentha suaveolens           |   | U |   |   |  |   |   |   |
| Lamiaceae Monardella lanceolata       |   | R |   |   |  |   |   |   |
| Lamiaceae Monardella sp.              |   |   |   | R |  |   |   |   |
| Lamiaceae Monardella villosa          |   | R |   |   |  |   | R | R |
| Lamiaceae Salvia columbariae          |   |   |   |   |  |   | R |   |
| Lamiaceae Salvia mellifera            | R | U | U | U |  |   | U | R |
| Lamiaceae Stachys bullata             |   | U | R | U |  |   | R | U |
| Lamiaceae Trichostema lanatum         | R | U | U | R |  |   | R | R |
| Lamiaceae Trichostema lanceolatum     | R | U |   |   |  |   |   | R |
| Liliaceae Bloomeria crocea            |   | U | U |   |  |   | U |   |
| Liliaceae Brodiaea sp.                |   | R |   |   |  |   |   |   |
| Liliaceae Brodiaea terrestris         |   | R | U |   |  |   | R | R |
| Liliaceae Calochortus venustus        |   | U | U | U |  |   | U | U |
| Liliaceae Dichelostemma capitatum     |   | U |   |   |  |   | R | U |
| Liliaceae Triteleia hyacinthina       |   | R |   |   |  |   |   |   |
| Liliaceae Triteleia lugens            |   | R | U |   |  |   |   | U |
| Liliaceae Zigadenus fremontii         |   | R | R |   |  |   |   |   |
| Liliaceae Zigadenus venenosus         |   |   |   |   |  |   |   | R |
| Malvaceae Eremalche parryi            |   |   |   | U |  |   |   |   |
| Malvaceae Malacothamnus aboriginum    |   | U | U |   |  |   | U | U |
| Oleaceae Fraxinus dipetala            |   | R |   |   |  |   | R |   |
| Onagraceae Camissonia sp.             | R | U | R | R |  |   |   | R |
| Onagraceae Clarkia affinis            |   | R |   |   |  |   | R |   |
| Onagraceae Clarkia cylindrica         |   | R | R |   |  |   |   | R |
| Onagraceae Clarkia modesta            |   | R | R | R |  |   | R |   |
| Onagraceae Clarkia purpurea           | R | U | U | U |  |   | C | U |
| Onagraceae Clarkia similis            |   | R |   |   |  |   |   |   |
| Onagraceae Clarkia sp.                | U | U | U | U |  |   |   |   |
| Onagraceae Clarkia speciosa           |   |   |   |   |  |   | R | R |
| Onagraceae Clarkia unguiculata        |   | C | C | U |  |   | C | C |
| Onagraceae Epilobium canum            |   |   | R |   |  |   |   |   |
| Orobanchaceae Castilleja affinis      |   |   | R |   |  |   | R |   |
| Orobanchaceae Castilleja exserta      |   | R | R |   |  |   | R |   |
| Orobanchaceae Castilleja sp.          |   | R | R |   |  |   |   |   |
| Orobanchaceae Pedicularis densiflora  |   |   |   |   |  |   | R |   |
| Orobanchaceae Pedicularis sp.         |   |   | R |   |  |   |   |   |
| Orobanchaceae Triphysaria pusilla     |   |   |   |   |  |   | R |   |
| Papaveraceae Dendromecon rigida       |   | U | R | R |  |   | R |   |
| Papaveraceae Eschscholzia californica | U | C | U | C |  | R | C | C |
| Papaveraceae Eschscholzia sp.         |   |   |   |   |  | R |   |   |
| Papaveraceae Meconella linearis       |   | R |   |   |  |   |   |   |
| Papaveraceae Platystemon sp.          |   |   | R |   |  |   |   |   |
| Phymaceae Mimulus aurantiacus         | R | C | R | C |  |   | U | R |
| Phymaceae Mimulus guttatus            |   |   |   | R |  |   | U | R |
| Phymaceae Mimulus pilosus             |   | U |   |   |  |   |   |   |
| Phymaceae Mimulus sp.                 |   | R | R |   |  |   |   |   |

|                                                           |   |   |   |   |  |   |   |   |
|-----------------------------------------------------------|---|---|---|---|--|---|---|---|
| Pinaceae <i>Pinus sabiniana</i>                           |   |   |   |   |  |   | R | R |
| Plantaginaceae <i>Antirrhinum multiflorum</i>             |   | U | R |   |  |   |   |   |
| Plantaginaceae <i>Antirrhinum sp.</i>                     |   |   | R | R |  |   |   |   |
| Plantaginaceae <i>Collinsia heterophylla</i>              | U | C | C | U |  |   | R | U |
| Plantaginaceae <i>Collinsia parviflora</i>                |   | U |   |   |  |   |   |   |
| Plantaginaceae <i>Keckiella breviflora</i>                |   | U | U |   |  |   |   |   |
| Plantaginaceae <i>Penstemon centranthifolius</i>          |   | U | R |   |  |   | U | U |
| Plantaginaceae <i>Penstemon heterophyllus</i>             |   | R | U |   |  |   | U | U |
| Plantaginaceae <i>Plantago erecta</i>                     |   |   |   |   |  |   | R |   |
| Plantaginaceae <i>Veronica anagallis-aquatica</i>         |   | U |   |   |  |   | R |   |
| Polemoniaceae <i>Gilia achilleifolia</i>                  |   |   | U |   |  |   |   |   |
| Polemoniaceae <i>Gilia angelensis</i>                     |   | U |   |   |  |   |   |   |
| Polemoniaceae <i>Gilia capitata</i>                       | R | R |   |   |  |   | R |   |
| Polemoniaceae <i>Gilia sp.</i>                            |   | R | U |   |  |   |   |   |
| Polemoniaceae <i>Linanthus parviflorus</i>                |   |   |   |   |  |   | R |   |
| Polemoniaceae <i>Linanthus sp.</i>                        |   | R | R |   |  |   |   | R |
| Polemoniaceae <i>Navarretia hamata</i>                    |   |   |   |   |  |   |   | U |
| Polemoniaceae <i>Navarretia sp.</i>                       |   |   | R |   |  |   |   |   |
| Polygonaceae <i>Chorizanthe douglasii</i>                 | R | U |   | C |  |   | U | U |
| Polygonaceae <i>Eriogonum elongatum</i>                   |   | U |   |   |  |   |   |   |
| Polygonaceae <i>Eriogonum fasciculatum</i>                | U | C | C | U |  |   | R |   |
| Polygonaceae <i>Eriogonum fasciculatum var.foliolosum</i> |   |   |   |   |  |   | C | C |
| Polygonaceae <i>Eriogonum gracile</i>                     |   | R |   |   |  |   |   |   |
| Polygonaceae <i>Eriogonum nortonii</i>                    |   | R |   |   |  |   | R |   |
| Polygonaceae <i>Eriogonum sp.</i>                         |   |   | U |   |  |   |   |   |
| Polygonaceae <i>Eriogonum vimineum</i>                    |   | U |   |   |  |   |   |   |
| Polygonaceae <i>Polygonum punctatum</i>                   |   | R |   |   |  |   |   |   |
| Polygonaceae <i>Polygonum sp.</i>                         |   |   |   | U |  |   |   |   |
| Portulacaceae <i>Claytonia perfoliata</i>                 |   | R | U |   |  |   | U | R |
| Portulacaceae <i>Montia fontana</i>                       |   | R |   |   |  |   |   |   |
| Primulaceae <i>Anagallis arvensis</i>                     |   |   | R |   |  |   |   | R |
| Primulaceae <i>Dodecatheon clevelandii</i>                |   |   |   |   |  |   |   | R |
| Primulaceae <i>Dodecatheon clevelandii ssp.patulum</i>    |   |   |   |   |  |   | R |   |
| Primulaceae <i>Dodecatheon sp.</i>                        |   | R |   |   |  |   |   |   |
| Ranunculaceae <i>Clematis lasiantha</i>                   |   | R |   |   |  |   | R | R |
| Ranunculaceae <i>Clematis sp.</i>                         |   | R |   |   |  |   |   |   |
| Ranunculaceae <i>Delphinium hesperium</i>                 |   |   |   |   |  |   |   | R |
| Ranunculaceae <i>Delphinium hesperium ssp.pallescens</i>  |   |   |   |   |  |   | R |   |
| Ranunculaceae <i>Delphinium parryi</i>                    |   |   |   |   |  |   | R | R |
| Ranunculaceae <i>Delphinium parryi/patens</i>             |   |   |   |   |  |   | R |   |
| Ranunculaceae <i>Delphinium sp.</i>                       |   | U | R | R |  |   |   |   |
| Ranunculaceae <i>Ranunculus californicus</i>              |   | R | U |   |  |   | C | U |
| Rhamnaceae <i>Ceanothus cuneatus</i>                      |   | R | C | U |  |   | U |   |
| Rhamnaceae <i>Ceanothus cuneatus var.cuneatus</i>         |   |   |   |   |  |   | U | U |
| Rhamnaceae <i>Ceanothus sp.</i>                           |   |   | R |   |  | R |   |   |
| Rhamnaceae <i>Rhamnus ilicifolia</i>                      |   | R | U | C |  |   | R | R |
| Rhamnaceae <i>Rhamnus sp.</i>                             |   |   |   |   |  |   | R |   |
| Rosaceae <i>Adenostoma fasciculatum</i>                   | U | U | C | R |  |   | C | C |
| Rosaceae <i>Cercocarpus betuloides</i>                    |   | R |   |   |  |   | R | R |
| Rosaceae <i>Drymocallis glandulosa</i>                    |   |   |   |   |  |   |   | R |
| Rosaceae <i>Heteromeles arbutifolia</i>                   |   | U |   |   |  |   | R |   |
| Rosaceae <i>Prunus ilicifolia</i>                         |   | U | R | C |  |   | R |   |
| Rosaceae <i>Rosa californica</i>                          |   | R |   |   |  |   | U | R |
| Rosaceae <i>Rubus parviflorus</i>                         |   |   |   | R |  |   |   |   |
| Rosaceae <i>Rubus sp.</i>                                 |   | R |   |   |  |   |   |   |



|                                                                                                                              |           |            |            |           |           |            |            |
|------------------------------------------------------------------------------------------------------------------------------|-----------|------------|------------|-----------|-----------|------------|------------|
| Rosaceae <i>Rubus ursinus</i>                                                                                                | U         |            |            |           |           |            |            |
| Rubiaceae <i>Galium</i> sp.                                                                                                  | R         |            |            |           |           |            |            |
| Salicaceae <i>Salix exigua</i>                                                                                               |           |            |            |           |           | U          | U          |
| Salicaceae <i>Salix laevigata</i>                                                                                            |           |            |            |           |           | U          | R          |
| Salicaceae <i>Salix lasiolepis</i>                                                                                           |           |            |            |           |           | U          | U          |
| Salicaceae <i>Salix</i> sp.                                                                                                  | U         | C          |            |           |           |            |            |
| Saxifragaceae <i>Lithophragma affine</i>                                                                                     |           | R          |            |           |           |            |            |
| Saxifragaceae <i>Saxifraga californica</i>                                                                                   |           | U          |            |           |           |            |            |
| Scrophulariaceae <i>Scrophularia californica</i>                                                                             | R         |            | R          |           |           |            |            |
| Solanaceae <i>Solanaceae</i> sp.                                                                                             |           |            |            | R         |           |            |            |
| Solanaceae <i>Solanum umbelliferum</i>                                                                                       | U         | R          |            |           |           | U          | U          |
| Valerianaceae <i>Plectritis ciliosa</i>                                                                                      |           |            |            |           |           |            | R          |
| Valerianaceae <i>Plectritis macrocera</i>                                                                                    |           | U          |            |           |           | U          |            |
| Valerianaceae <i>Plectritis</i> sp.                                                                                          | R         | U          |            |           |           |            |            |
| Verbenaceae <i>Verbena lasiostachys</i> var. <i>scabrida</i>                                                                 |           |            |            |           |           | R          | R          |
| Verbenaceae <i>Verbena</i> sp.                                                                                               |           |            |            |           |           |            | R          |
| Violaceae <i>Viola pedunculata</i>                                                                                           | R         | U          |            |           |           | U          | U          |
| <b>Count of unique floral taxa on which bees were collected in each year of Pinnacles study (sampling effort not equal):</b> | <b>30</b> | <b>142</b> | <b>115</b> | <b>49</b> | <b>11</b> | <b>128</b> | <b>102</b> |

817
